# Supplementary material
Source: publisher figshare collection journal article supplement (https://acs.figshare.com/ndownloader/files/5612415)
Supplement: Supplementary file 1 [file 5612415]

**Asymmetric Synthesis of 2-Substituted Azetidin-3-ones**  
**via Metalated SAMP/RAMP Hydrazones**

Alpa K. Pancholi, Joanna V. Geden, Guy J. Clarkson, and Michael Shipman\*

Department of Chemistry, University of Warwick, Gibbet Hill Road, Coventry, CV4 7AL, UK.

**SUPPORTING INFORMATION**

|                                                                                                |         |
|------------------------------------------------------------------------------------------------|---------|
| Depiction of X-ray structure of <b>16</b>                                                      | S2      |
| Copies of <sup>1</sup> H and <sup>13</sup> C NMR spectra of compounds <b>1</b> and <b>3-16</b> | S3-S17  |
| Copies of chiral GC and HPLC chromatograms for determination of <i>ee</i> values               | S18-S27 |
| References                                                                                     | S28     |

**X-ray crystal structure of 16 with thermal ellipsoids are drawn at 50% probability level:**

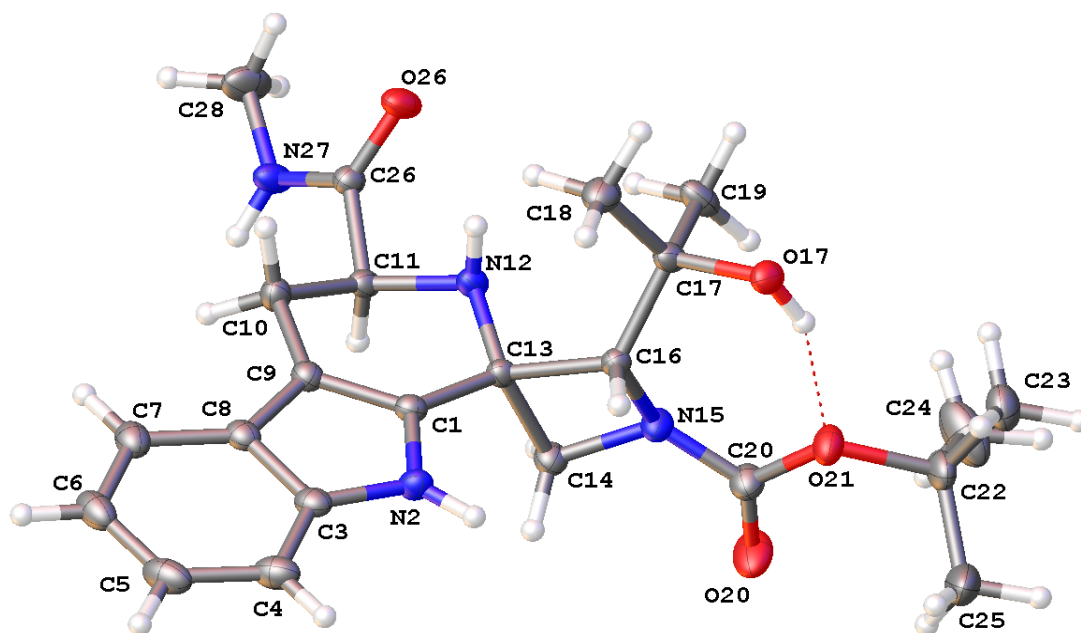

Single crystals of  $C_{23}H_{32}N_4O_4$  (**16**) were grown from methanol. A suitable crystal was selected and mounted on a glass fibre with Fromblin oil and placed on a Rigaku SuperNova diffractometer (Dual source with Cu at zero), with an AtlasS2 CCD area detector. The crystal was kept at 150(2) K during data collection. Using Olex2<sup>1</sup>, the structure was solved with the ShelXT<sup>2</sup> structure solution program using Direct Methods and refined with the ShelXL<sup>3</sup> refinement package using Least Squares minimisation. The NHs and OH were located in a difference map but refined at calculated positions except the hydrogen on amine N12 which was allowed to refine freely but given thermal parameters Uiso 1.5 time Ueqiv of the parent atom. The Flack parameter of the crystal chosen was Flack x: 0.017(37) (ShelXL 2014) and is also confirmed by the known stereochemistry of the L-tryptophan starting material. This structure has been deposited in the Cambridge Crystallographic Data Centre (<http://www.ccdc.cam.ac.uk/>) as CCDC 1481935. **Crystal Data** for  $C_{23}H_{32}N_4O_4$  ( $M=428.52$  g/mol): orthorhombic, space group  $P2_12_12_1$  (no. 19),  $a = 9.24482(4)$  Å,  $b = 13.77957(5)$  Å,  $c = 18.20928(9)$  Å,  $V = 2319.672(17)$  Å<sup>3</sup>,  $Z = 4$ ,  $T = 150(2)$  K,  $\mu(\text{CuK}\alpha) = 0.689$  mm<sup>-1</sup>,  $D_{\text{calc}} = 1.227$  g/cm<sup>3</sup>, 108912 reflections measured ( $8.046^\circ \leq 2\theta \leq 147.448^\circ$ ), 4697 unique ( $R_{\text{int}} = 0.0497$ ,  $R_{\text{sigma}} = 0.0129$ ) which were used in all calculations. The final  $R_1$  was 0.0283 ( $I > 2\sigma(I)$ ) and  $wR_2$  was 0.0727 (all data).

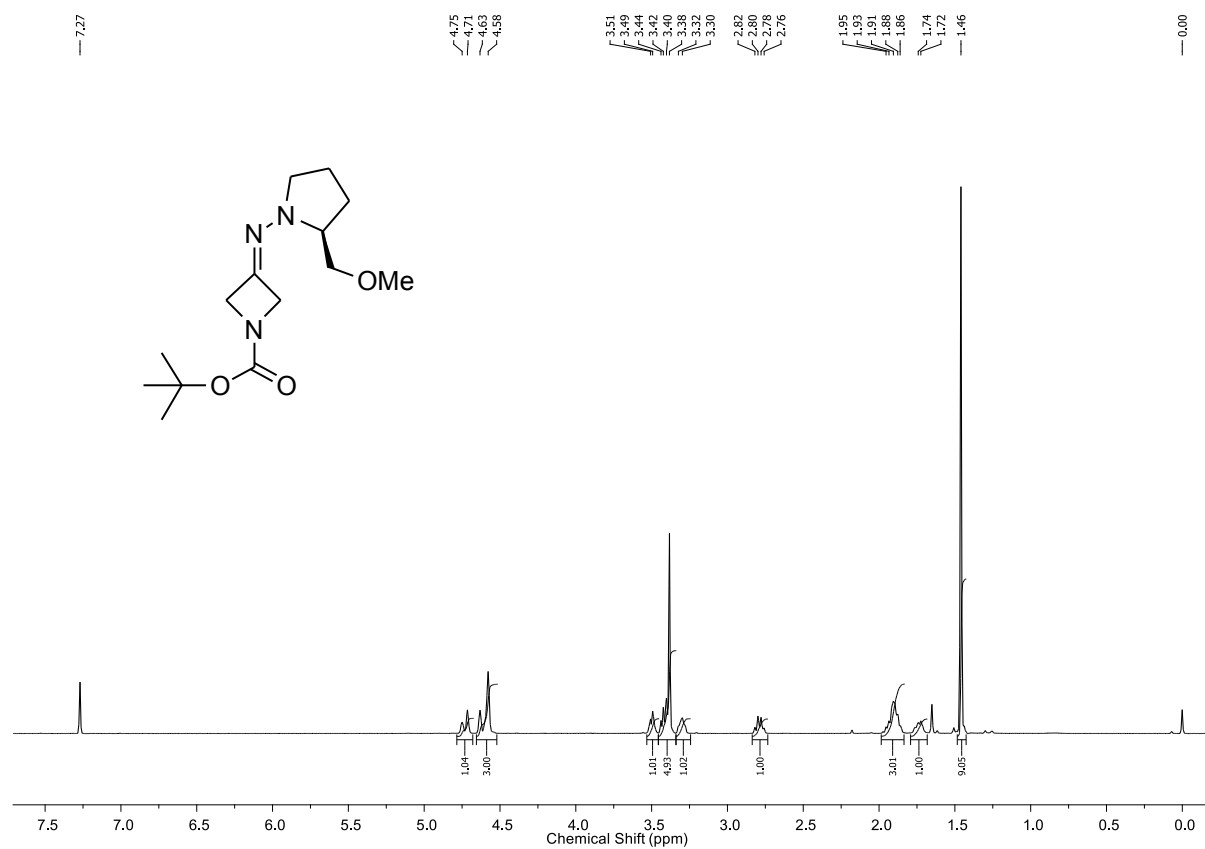**1** <sup>1</sup>H NMR (400 MHz, CDCl<sub>3</sub>)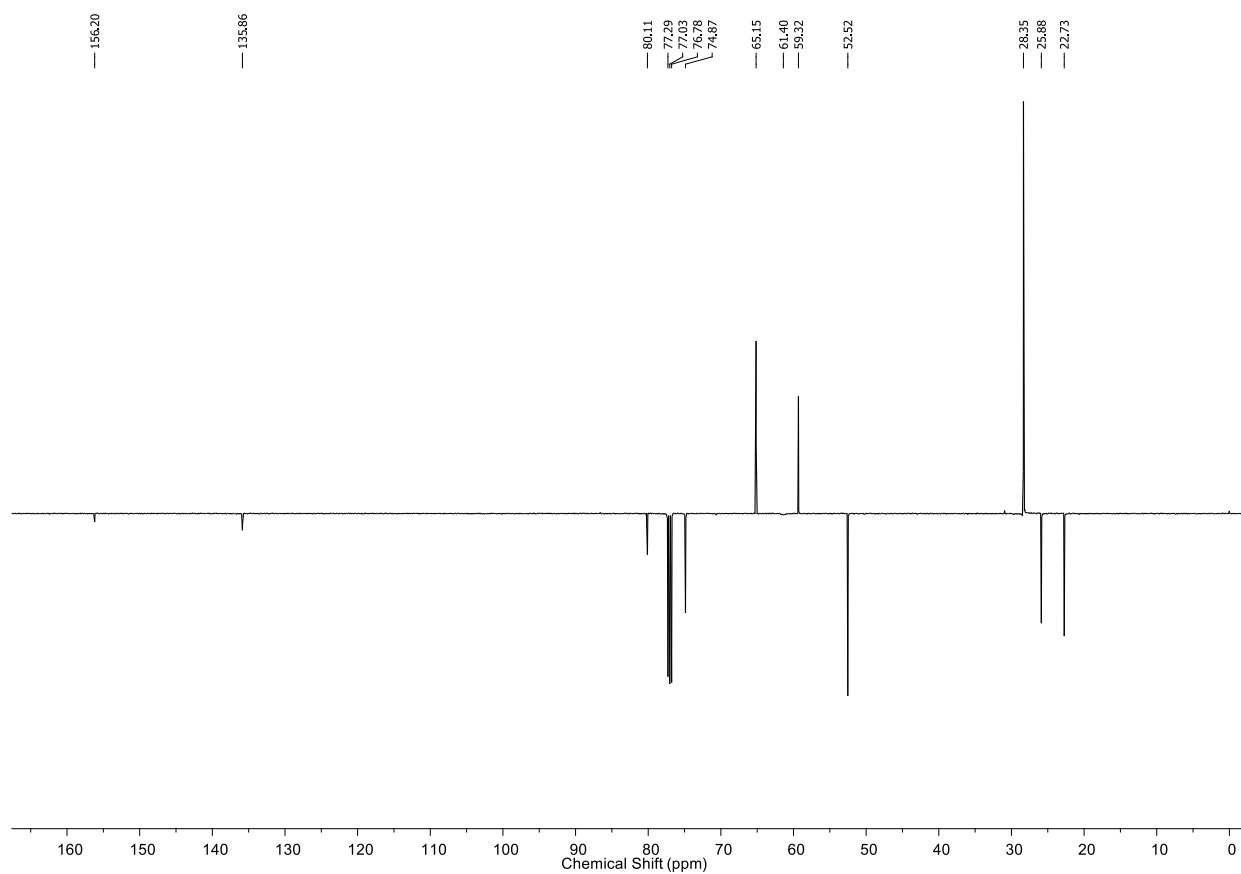**1** <sup>13</sup>C NMR (100 MHz, CDCl<sub>3</sub>)

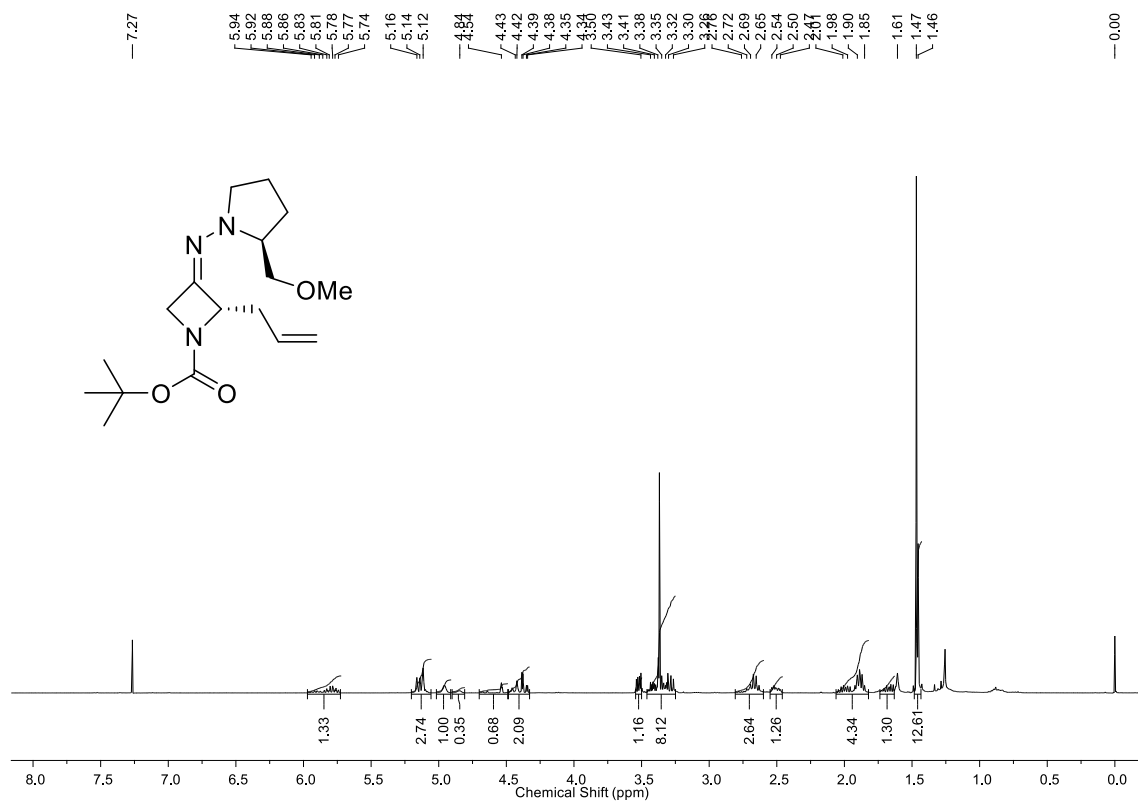

**3**  $^1\text{H}$  NMR (400 MHz,  $\text{CDCl}_3$ )

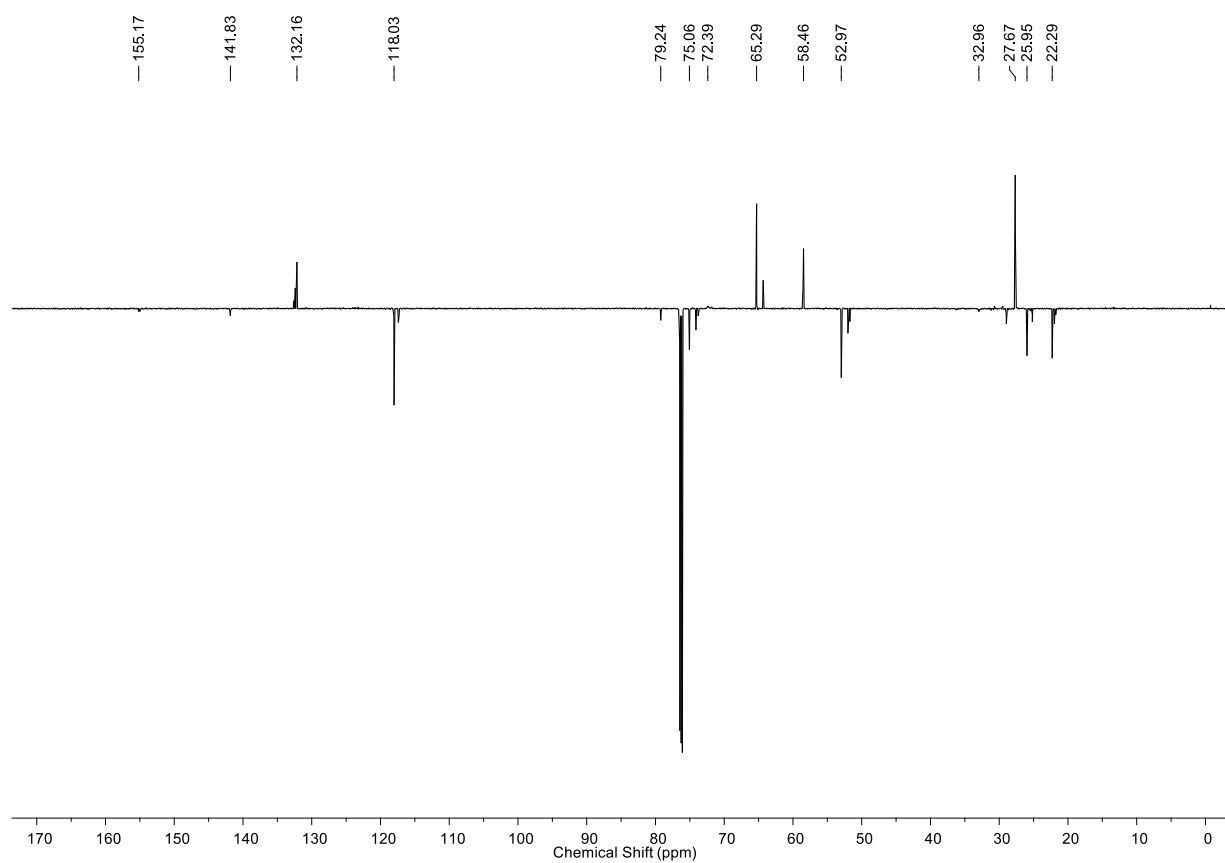

**3**  $^{13}\text{C}$  NMR (176 MHz,  $\text{CDCl}_3$ )



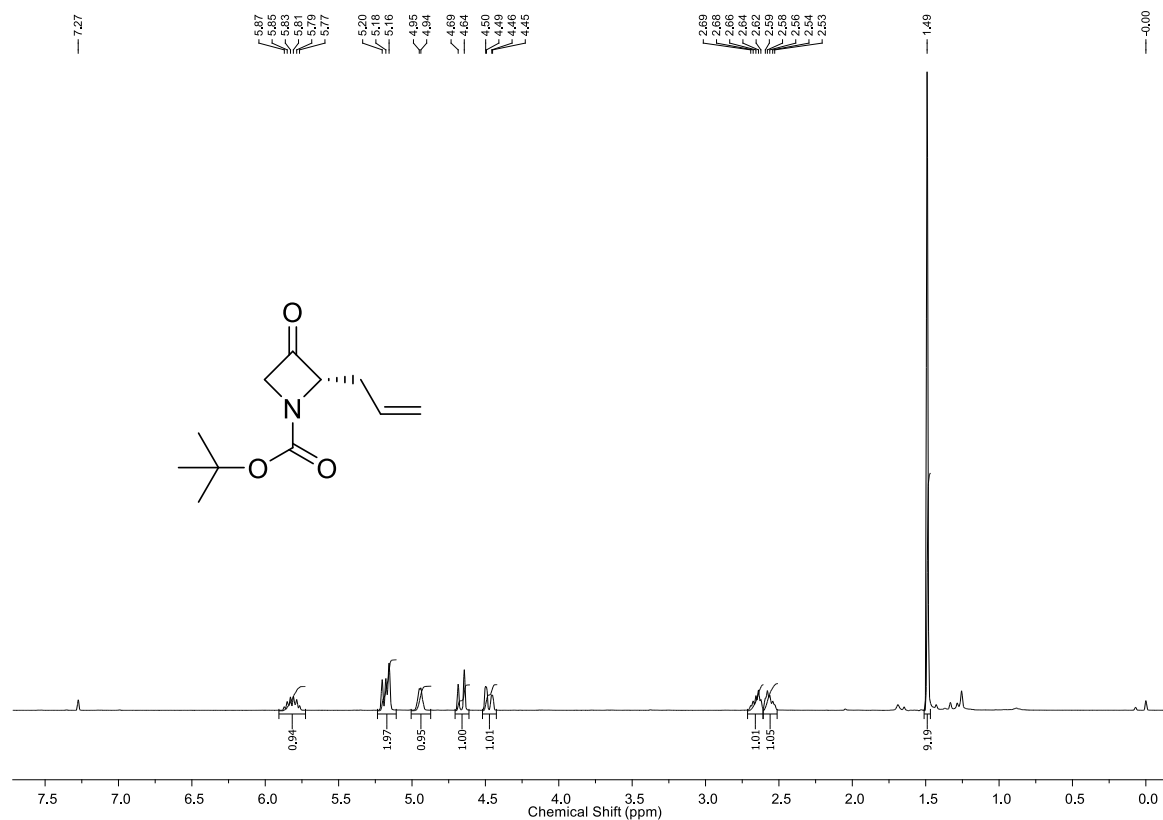

4 <sup>1</sup>H NMR (400 MHz, CDCl<sub>3</sub>)

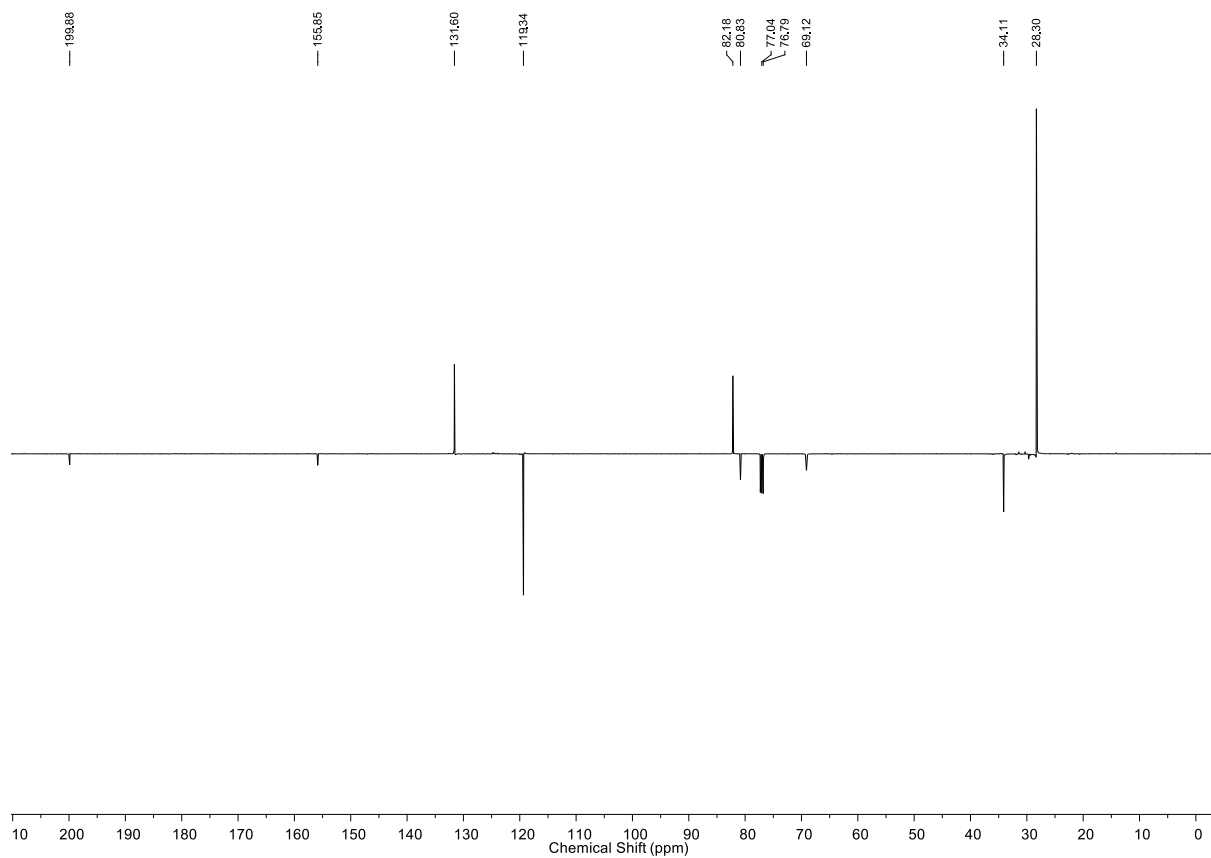

4 <sup>13</sup>C NMR (125 MHz, CDCl<sub>3</sub>)

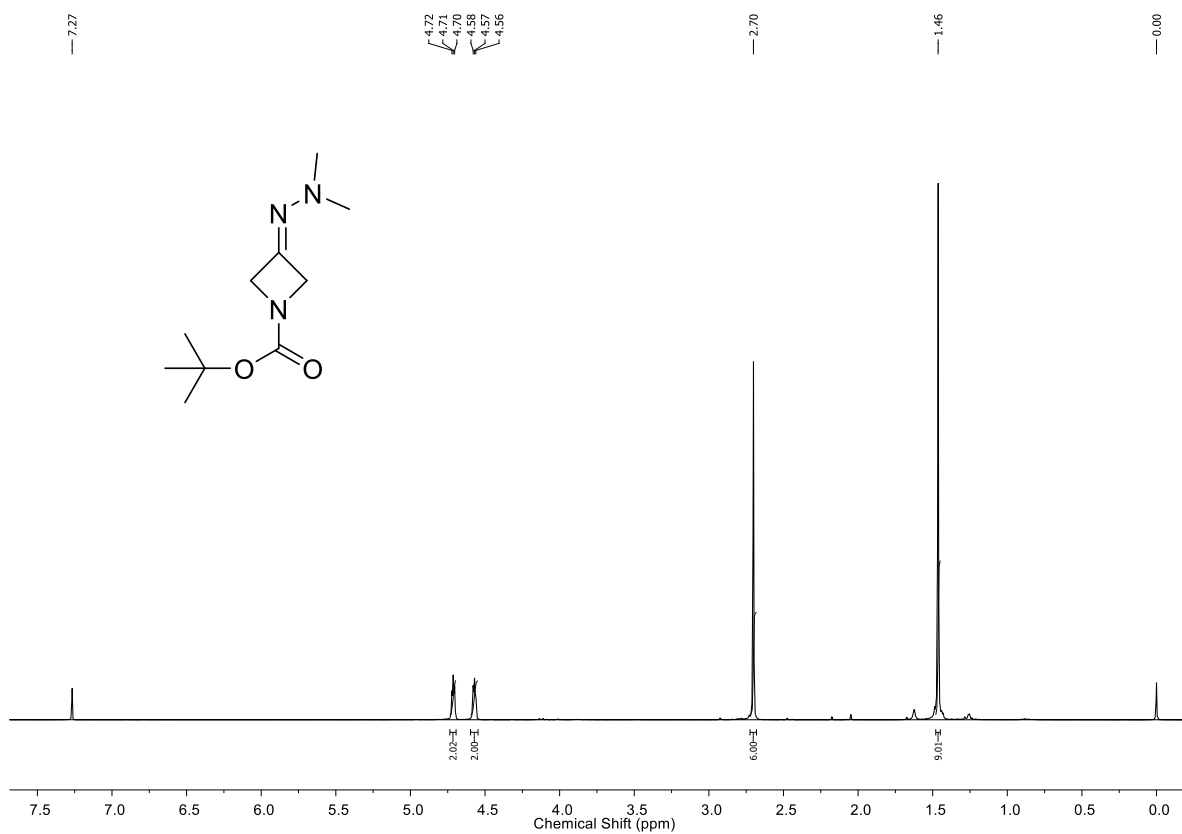

**5** <sup>1</sup>H NMR (400 MHz, CDCl<sub>3</sub>)

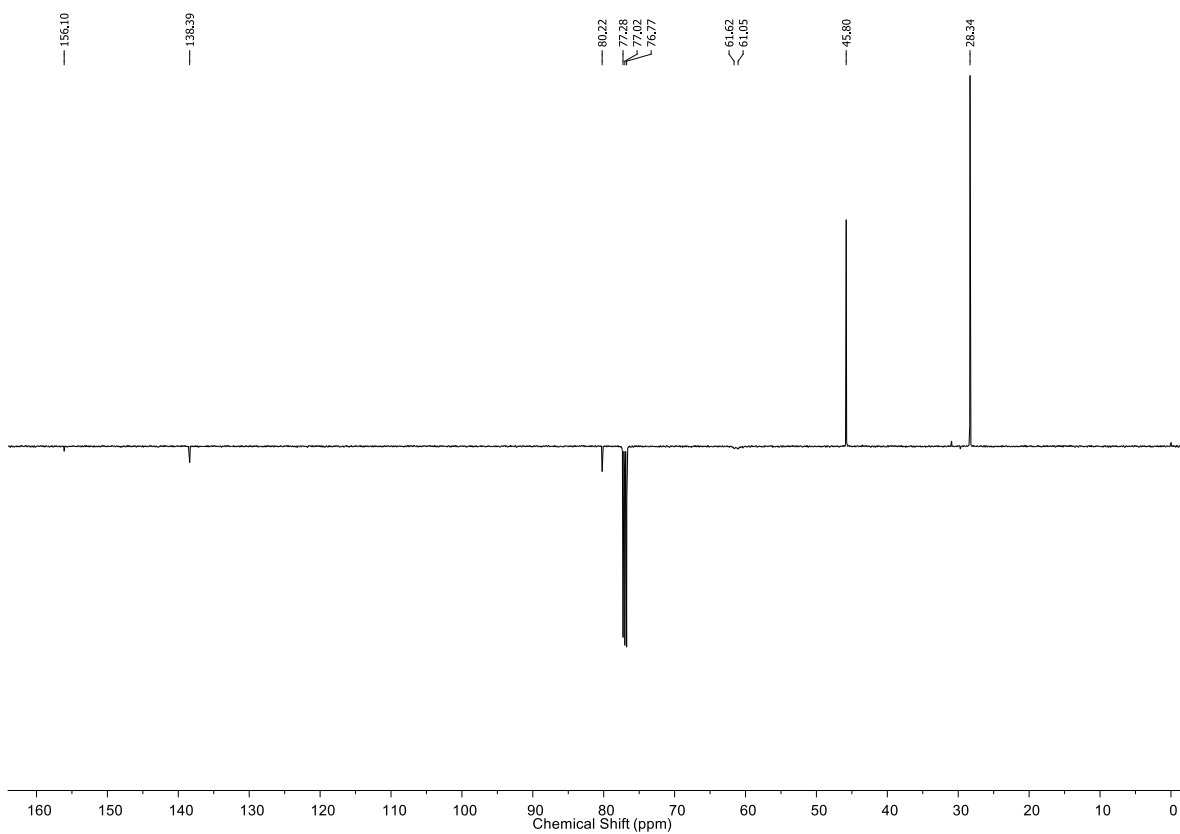

**5** <sup>13</sup>C NMR (125 MHz, CDCl<sub>3</sub>)

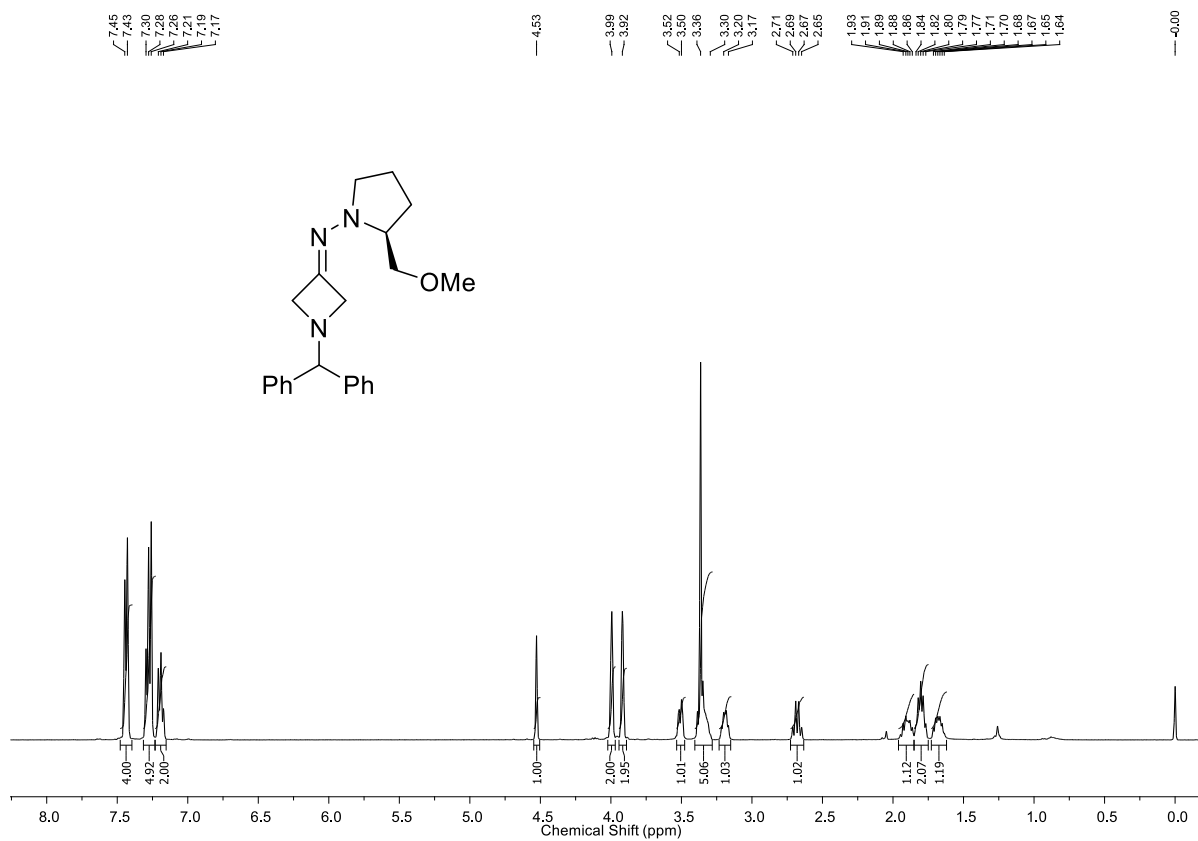

**6**  $^1\text{H}$  NMR (400 MHz,  $\text{CDCl}_3$ )

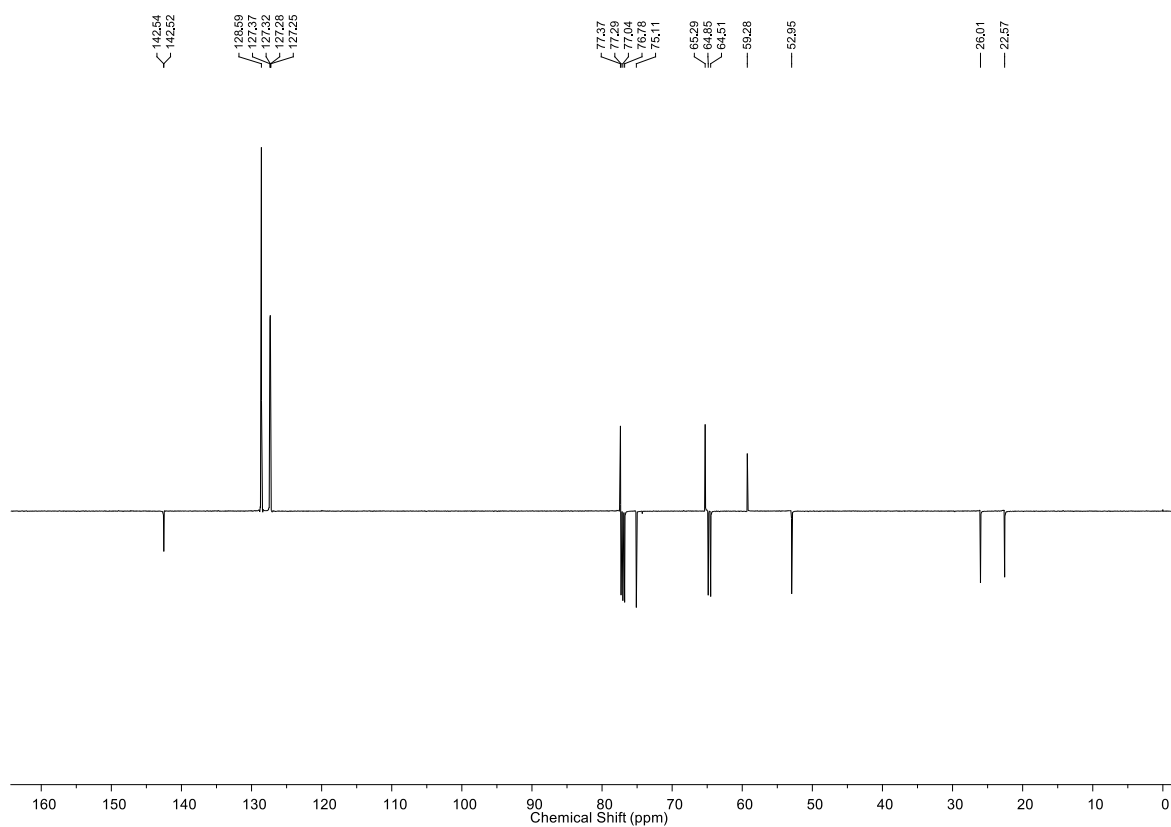

**6**  $^{13}\text{C}$  NMR (125 MHz,  $\text{CDCl}_3$ )

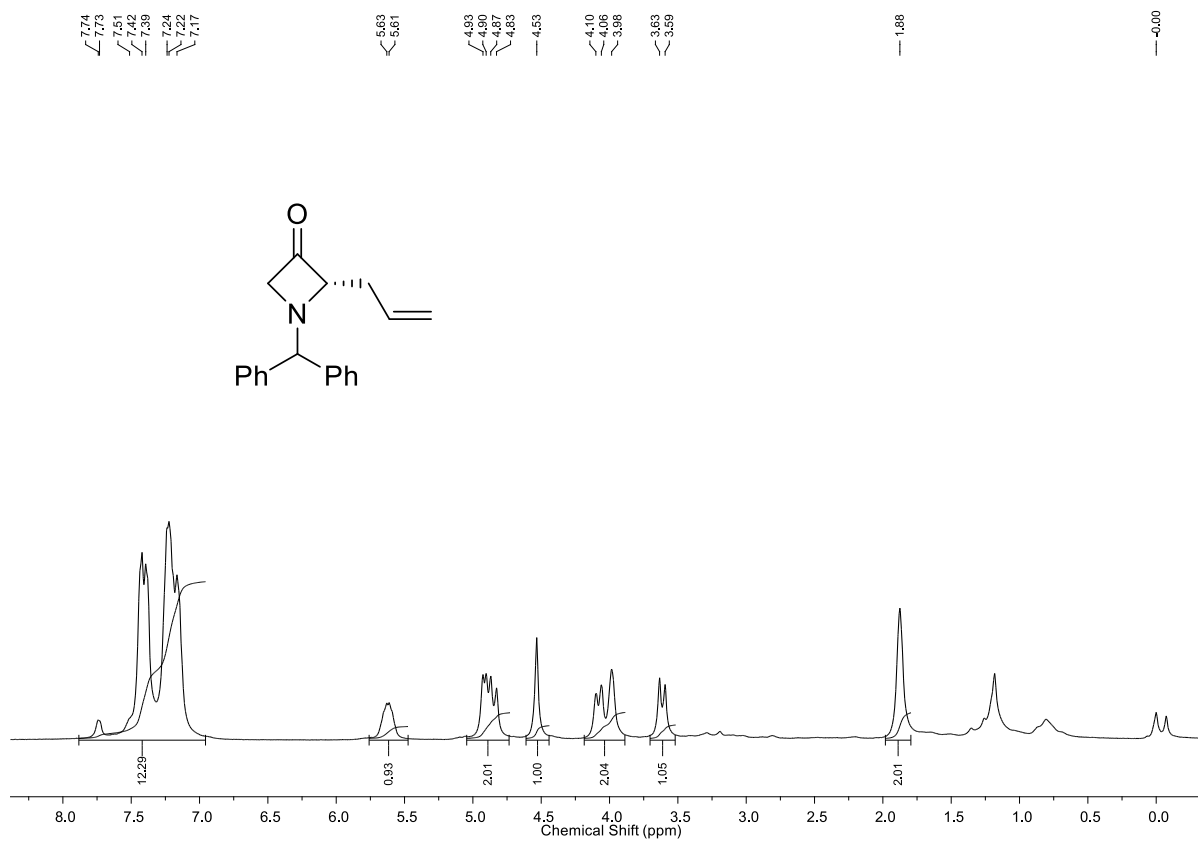

**7** <sup>1</sup>H NMR (400 MHz, CDCl<sub>3</sub>)

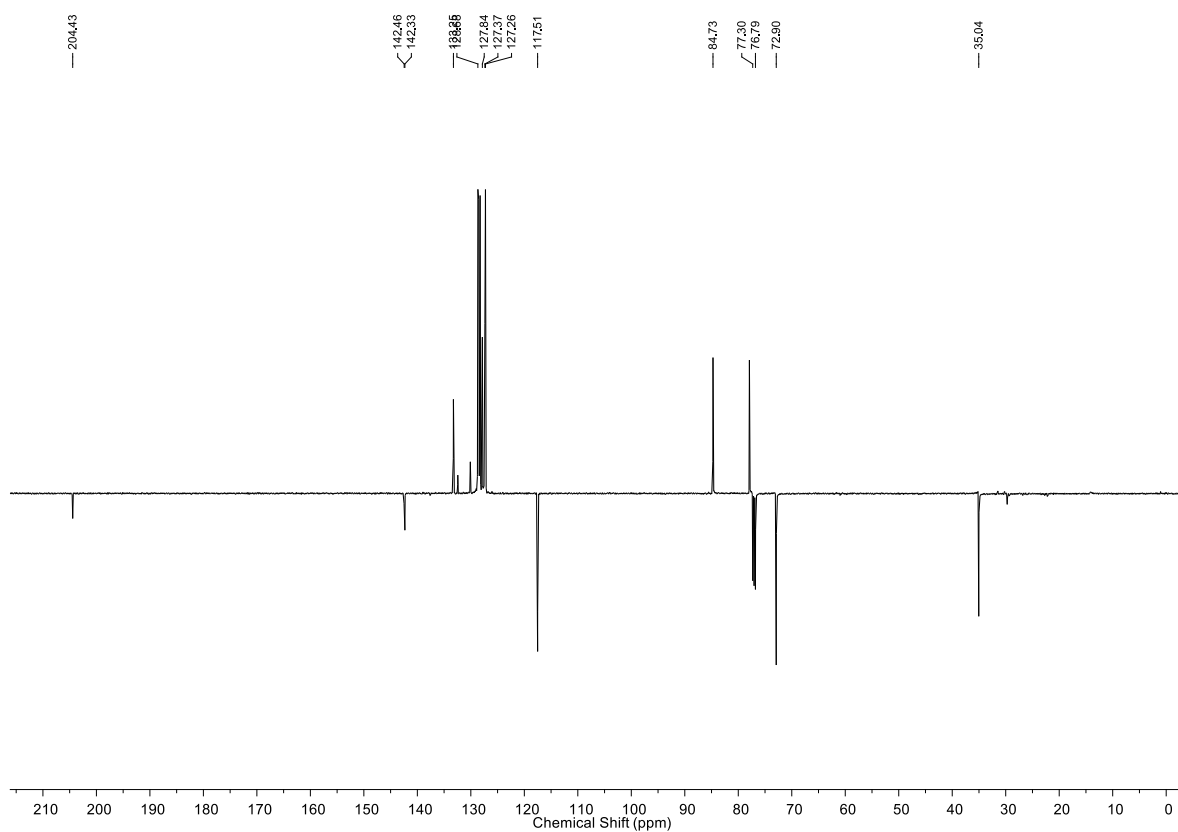

**7** <sup>13</sup>C NMR (125 MHz, CDCl<sub>3</sub>)

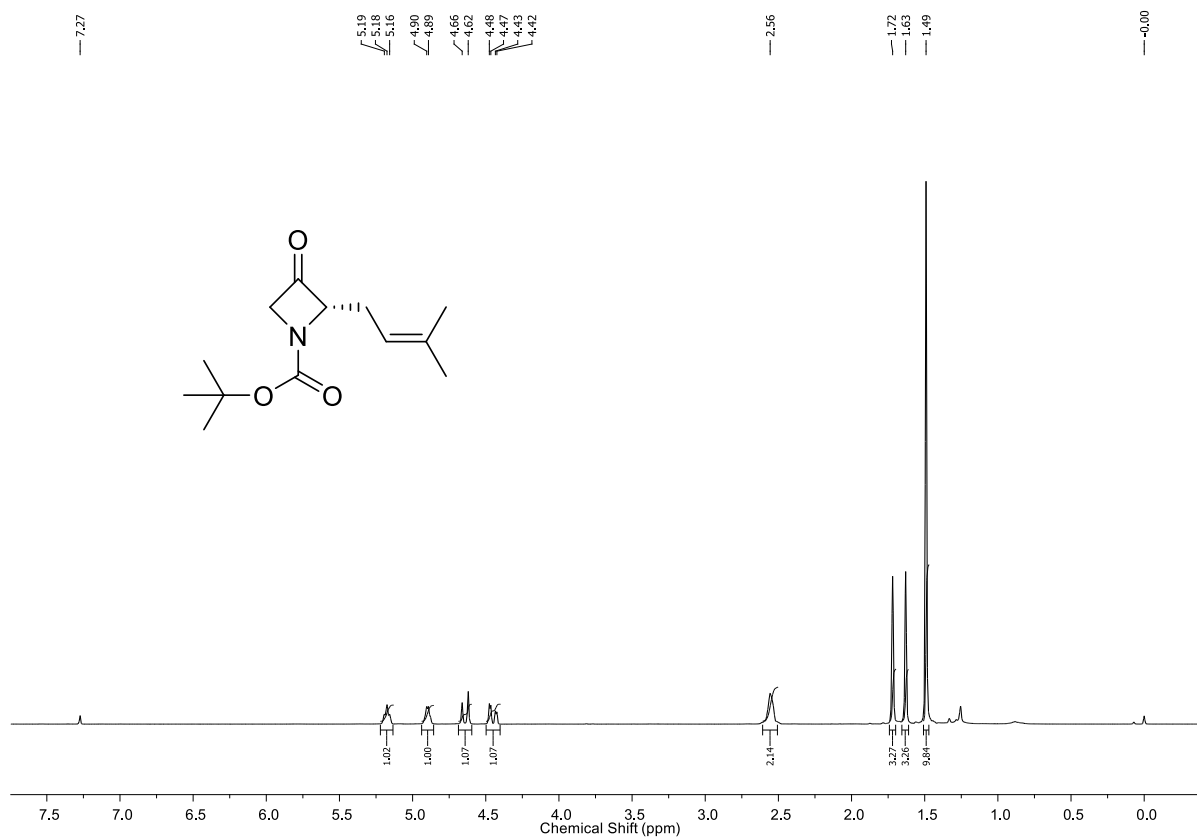**8** <sup>1</sup>H NMR (400 MHz, CDCl<sub>3</sub>)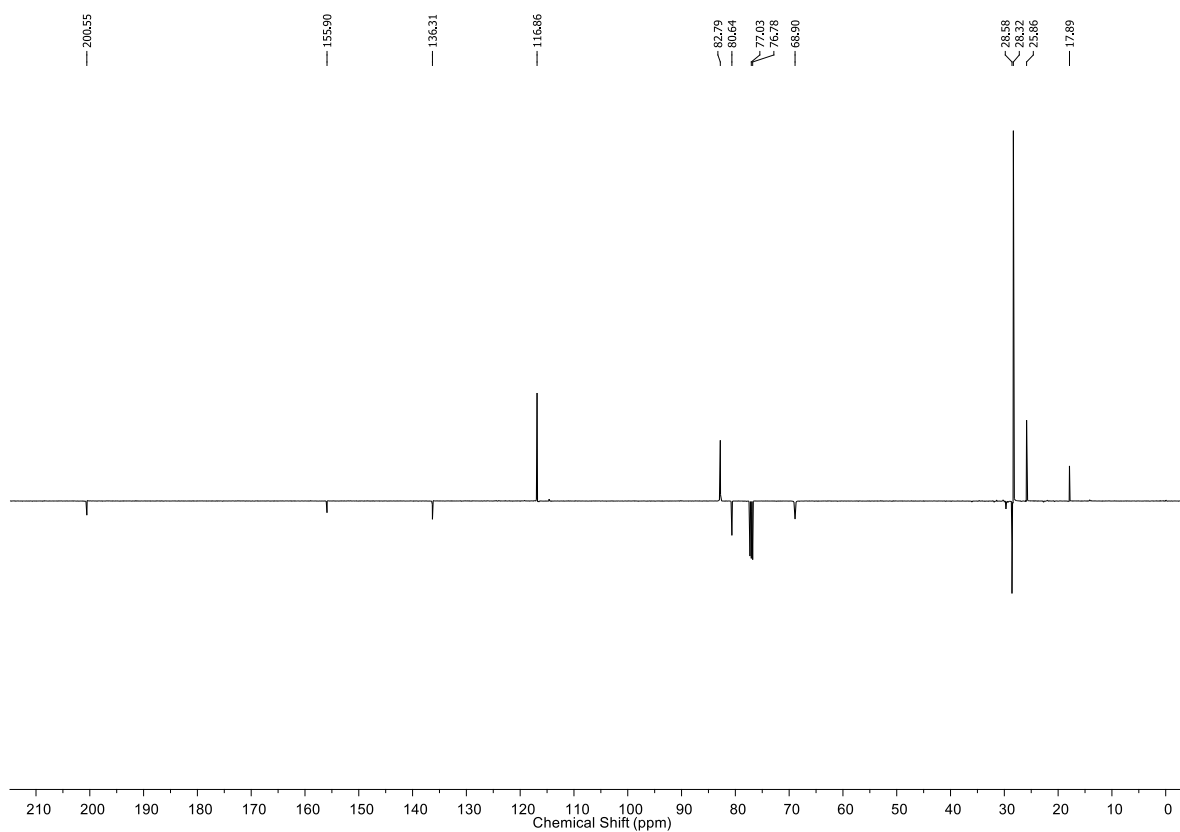**8** <sup>13</sup>C NMR (125 MHz, CDCl<sub>3</sub>)

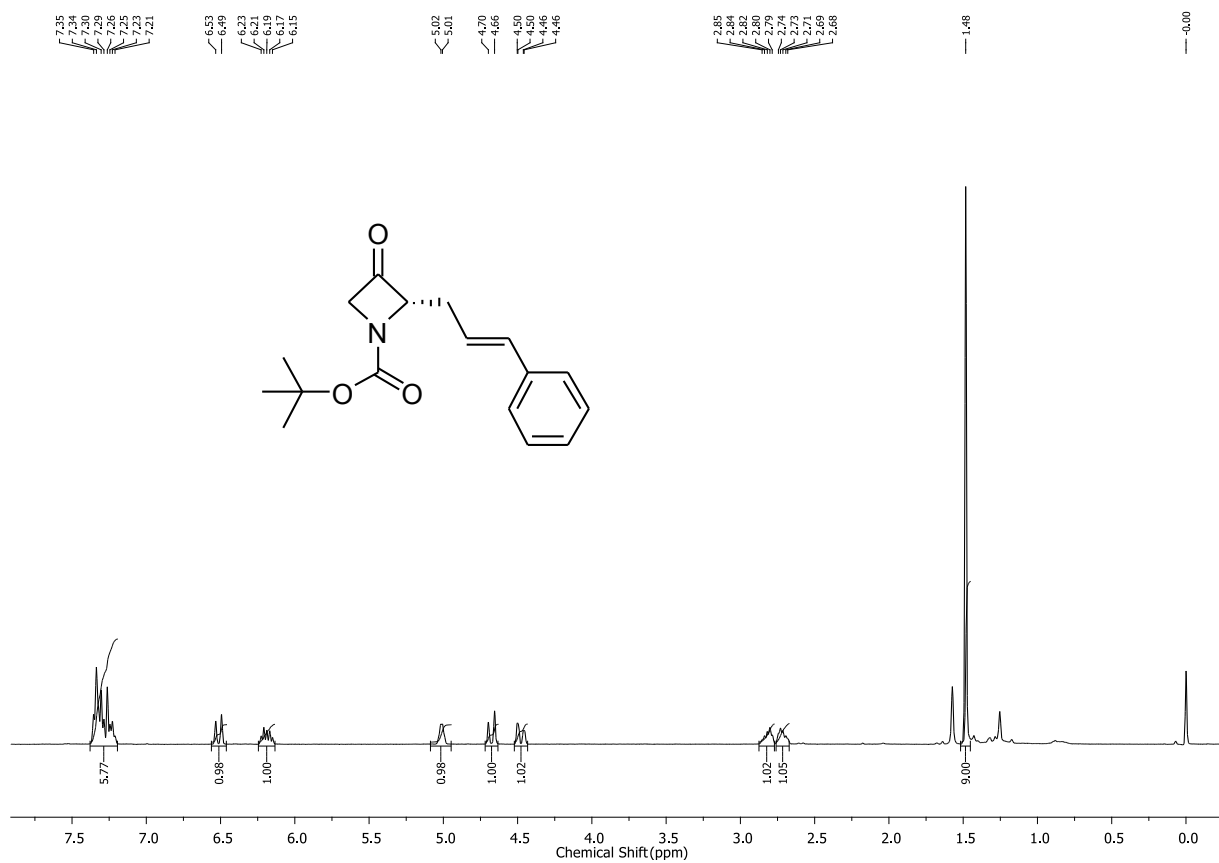

**9** <sup>1</sup>H NMR (400 MHz, CDCl<sub>3</sub>)

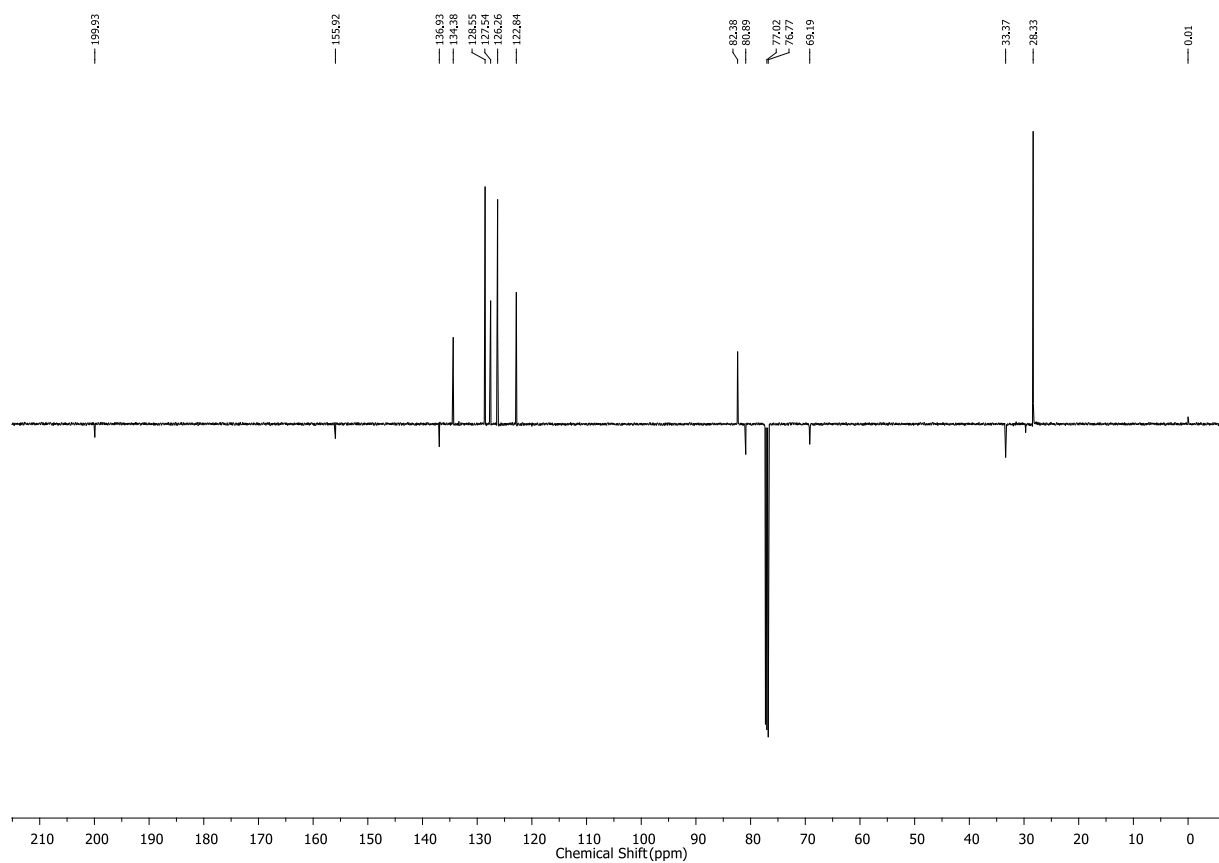

**9** <sup>13</sup>C NMR (125 MHz, CDCl<sub>3</sub>)

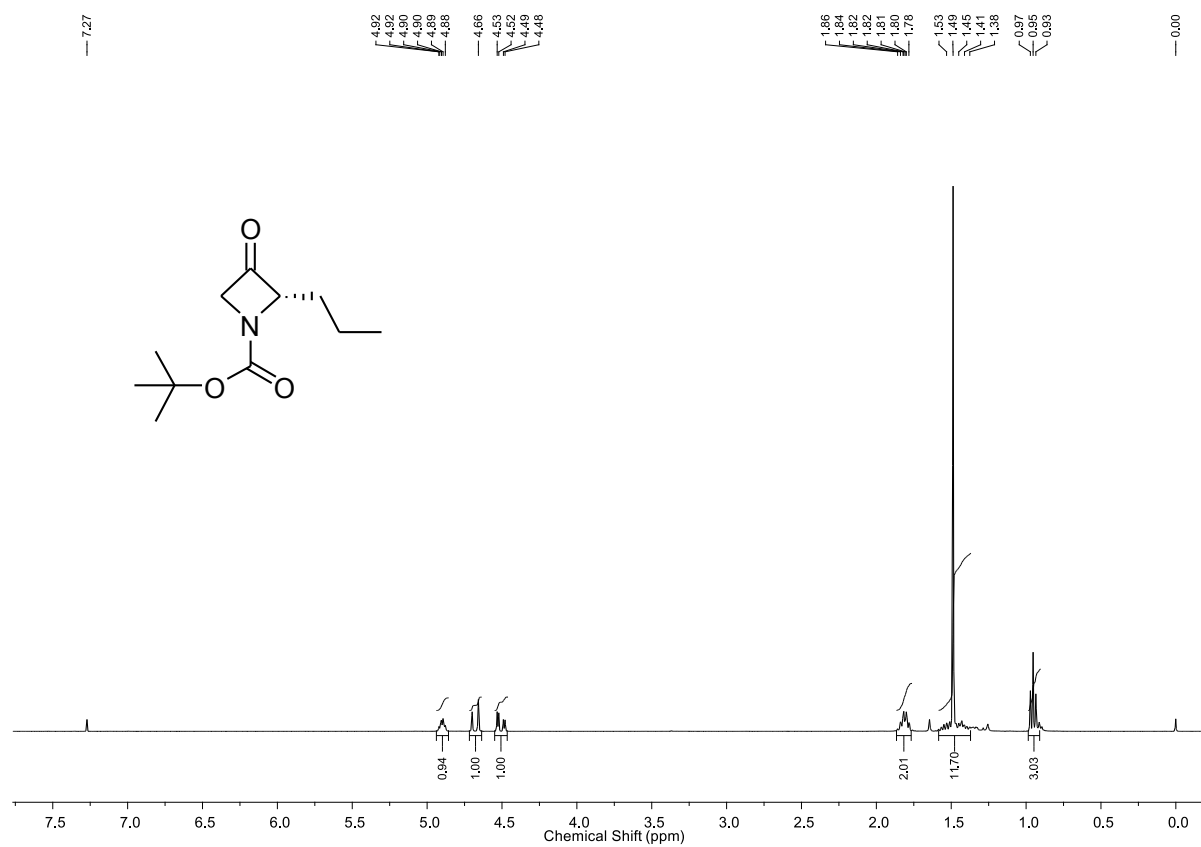

**10**  $^1\text{H}$  NMR (400 MHz,  $\text{CDCl}_3$ )

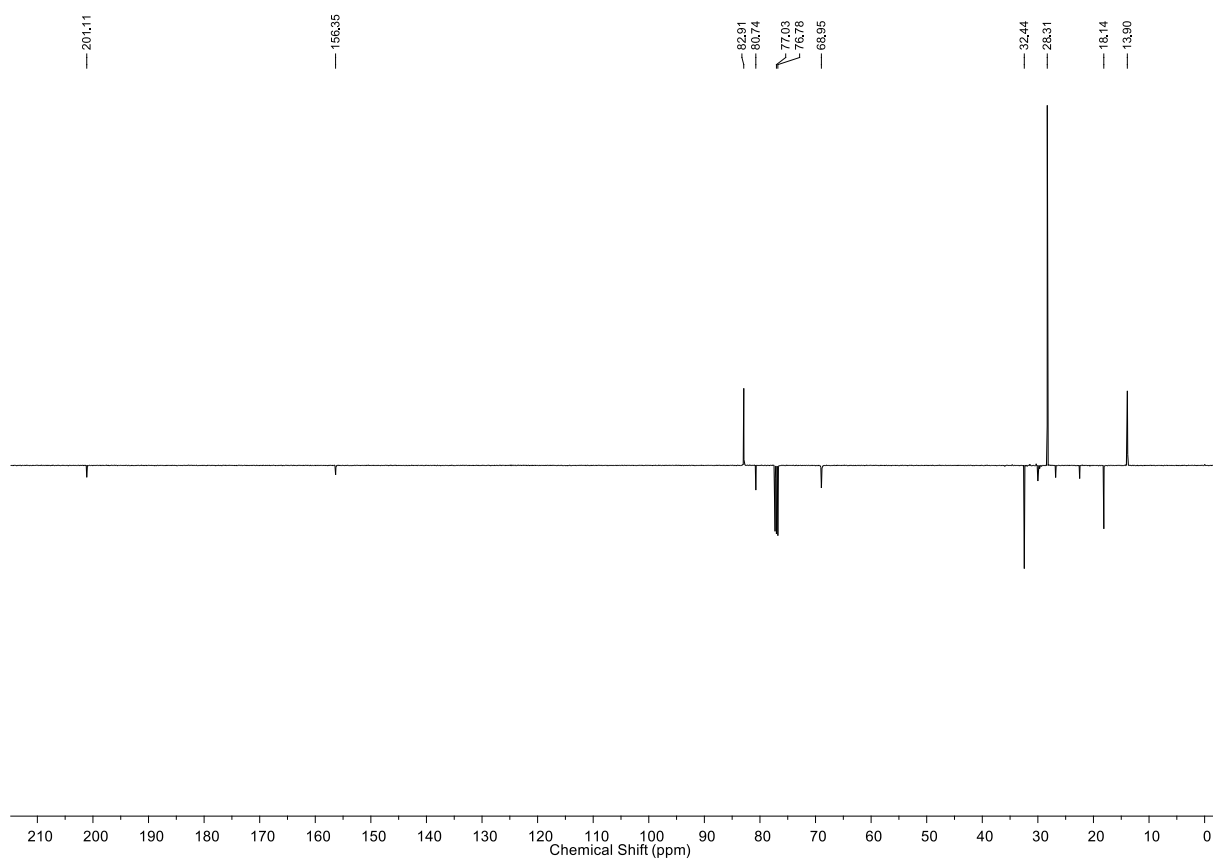

**10**  $^{13}\text{C}$  NMR (125 MHz,  $\text{CDCl}_3$ )

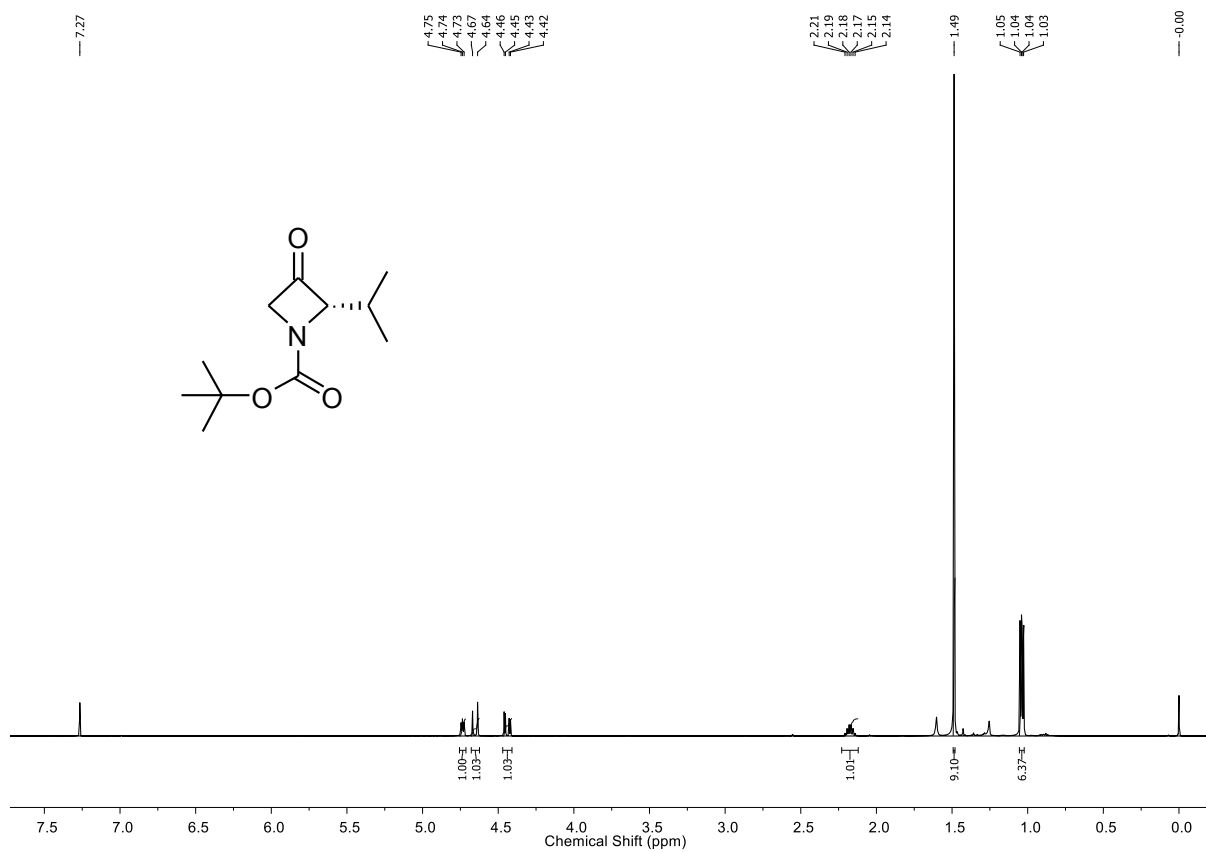**11** <sup>1</sup>H NMR (500 MHz, CDCl<sub>3</sub>)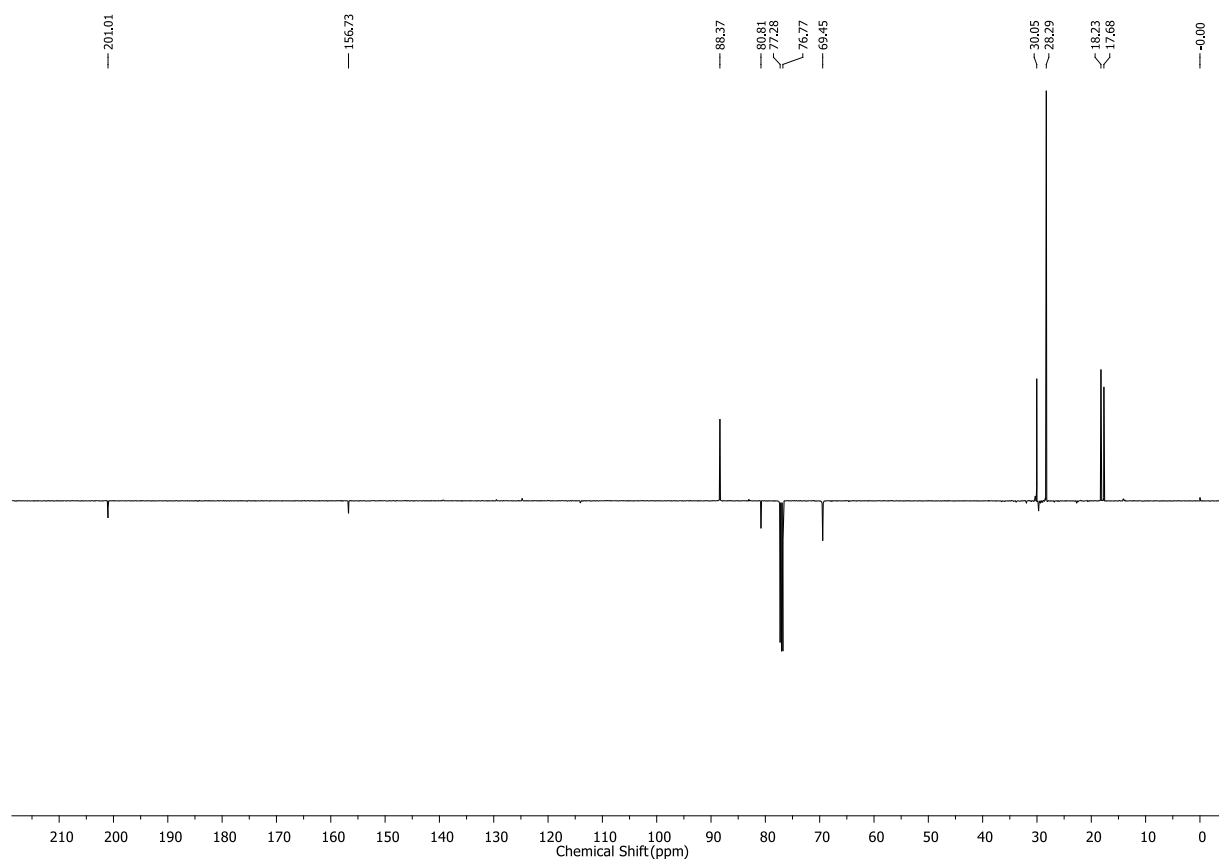**11** <sup>13</sup>C NMR (125 MHz, CDCl<sub>3</sub>)



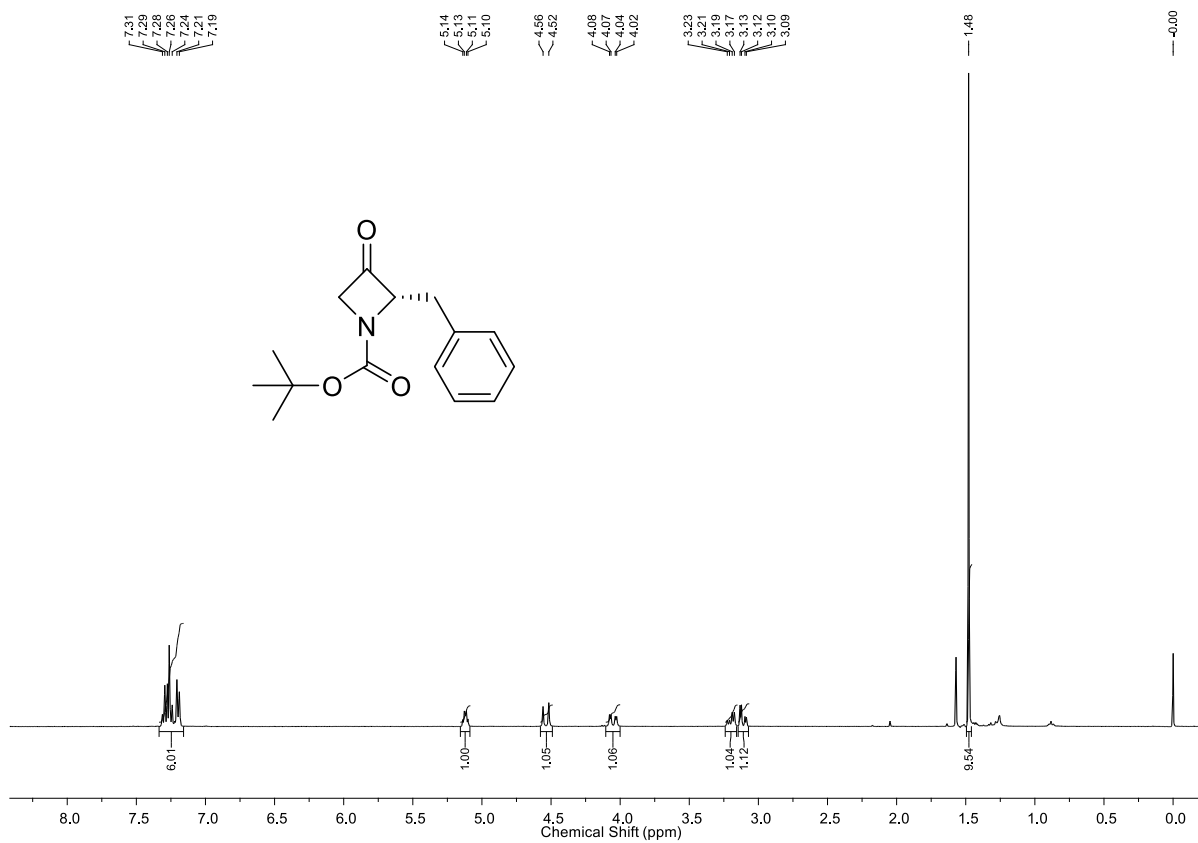

**12**  $^1\text{H}$  NMR (400 MHz,  $\text{CDCl}_3$ )

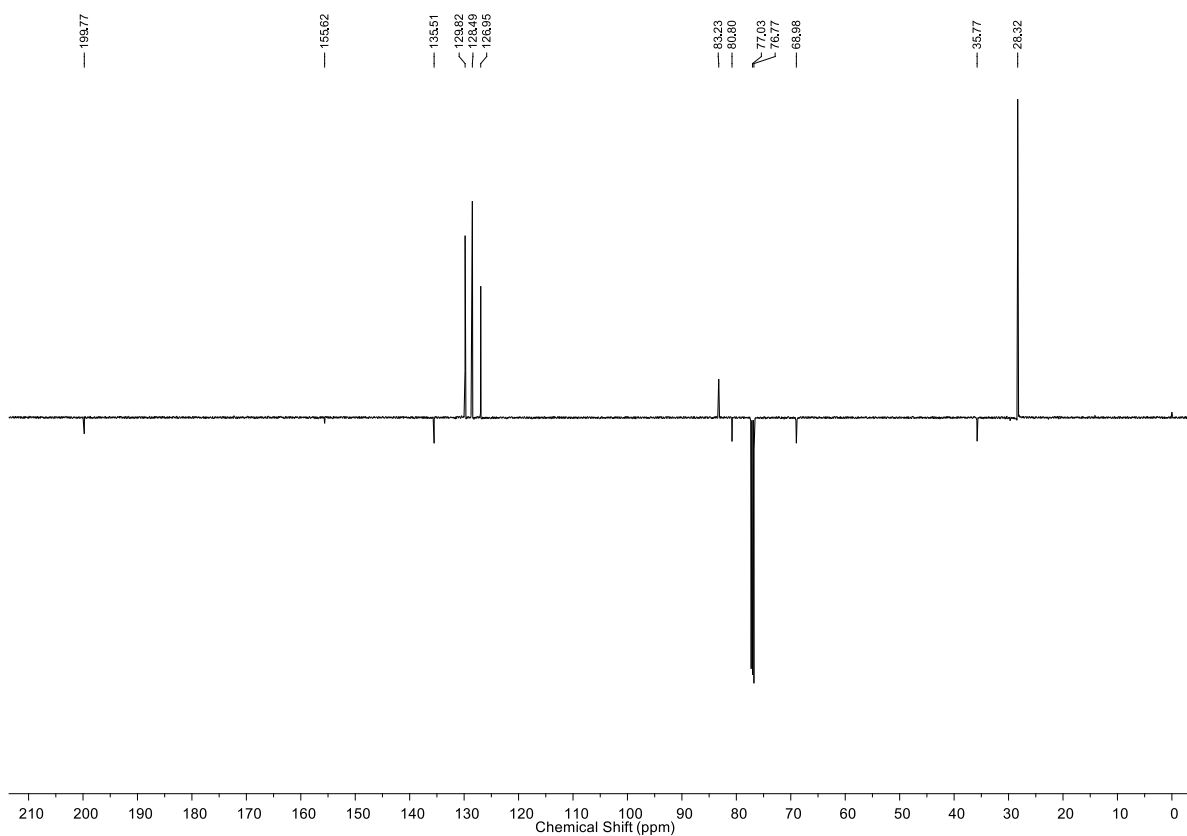

**12**  $^{13}\text{C}$  NMR (125 MHz,  $\text{CDCl}_3$ )

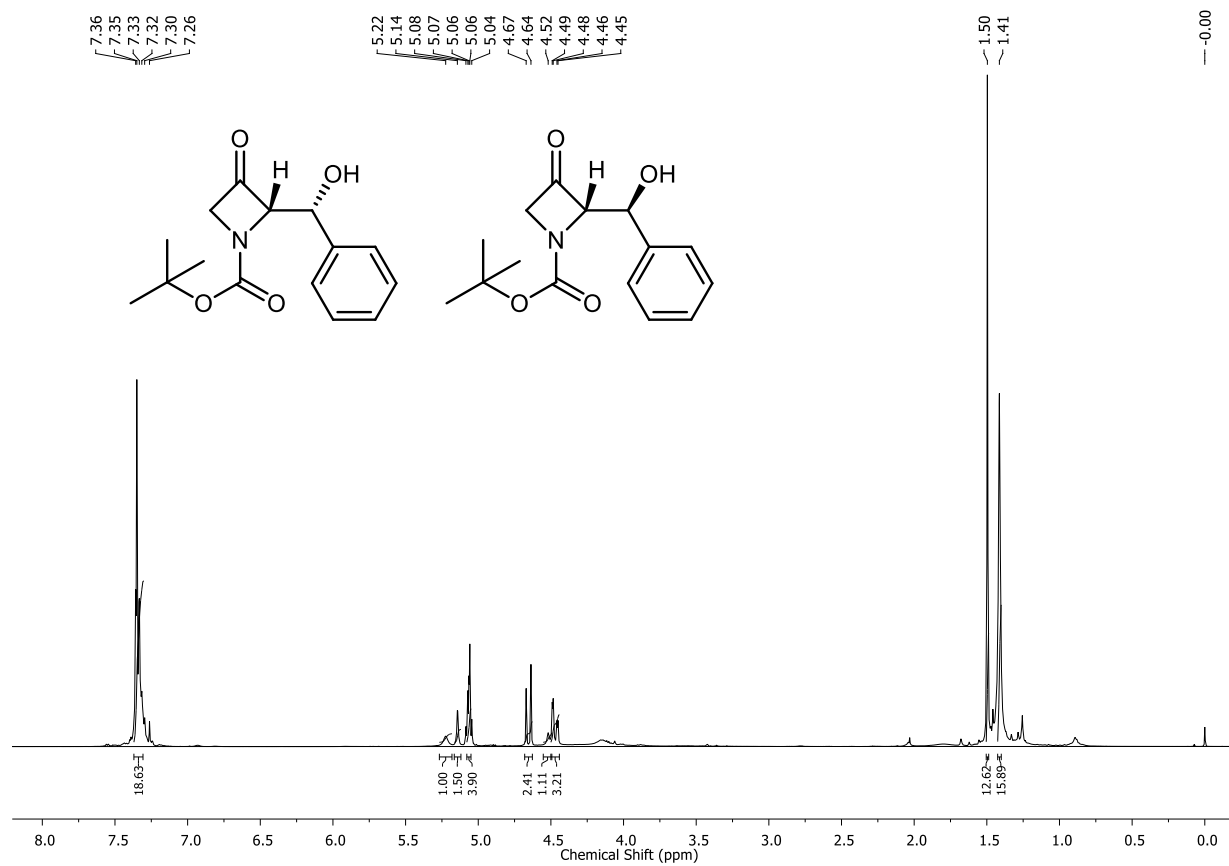

**<sup>13</sup>C NMR (125 MHz, CDCl<sub>3</sub>)**

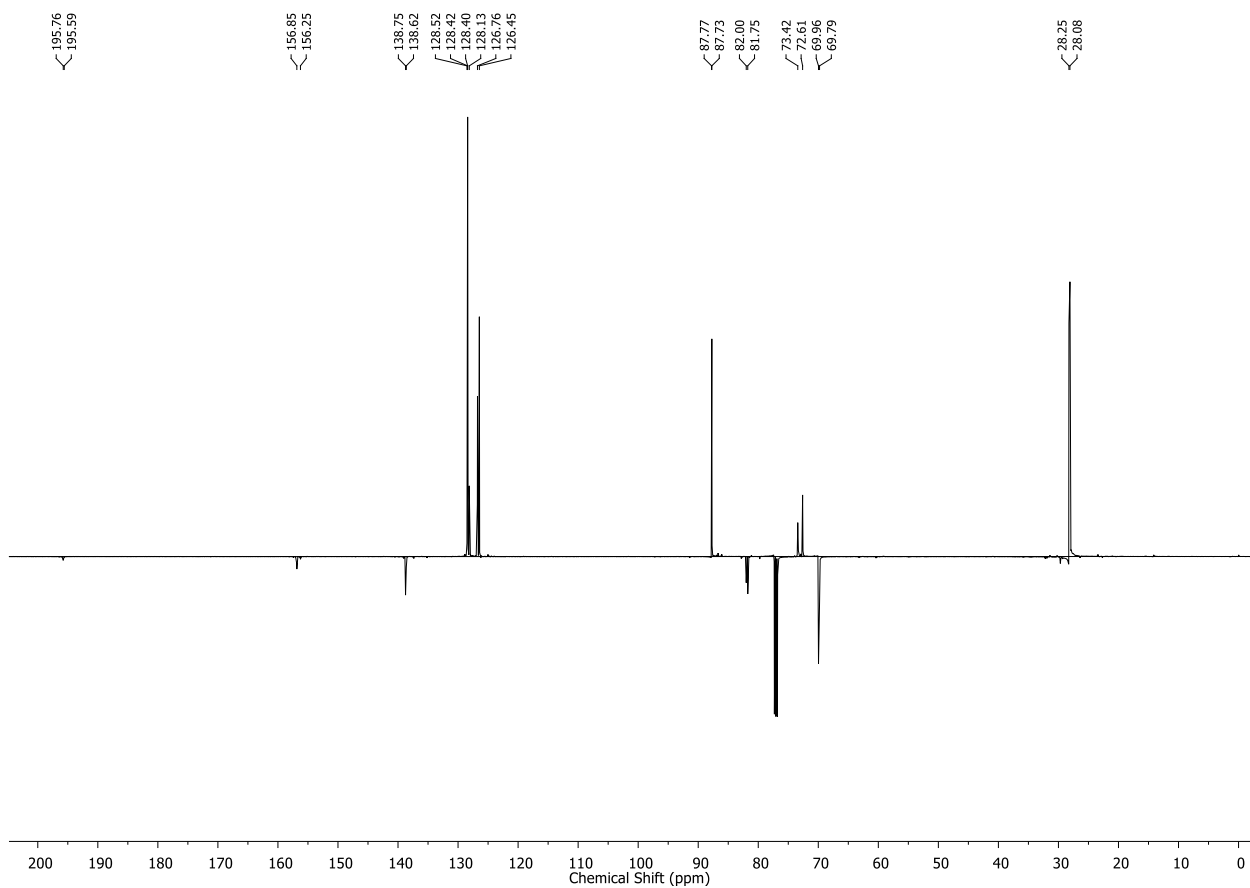

**<sup>13</sup>C NMR (125 MHz, CDCl<sub>3</sub>)**

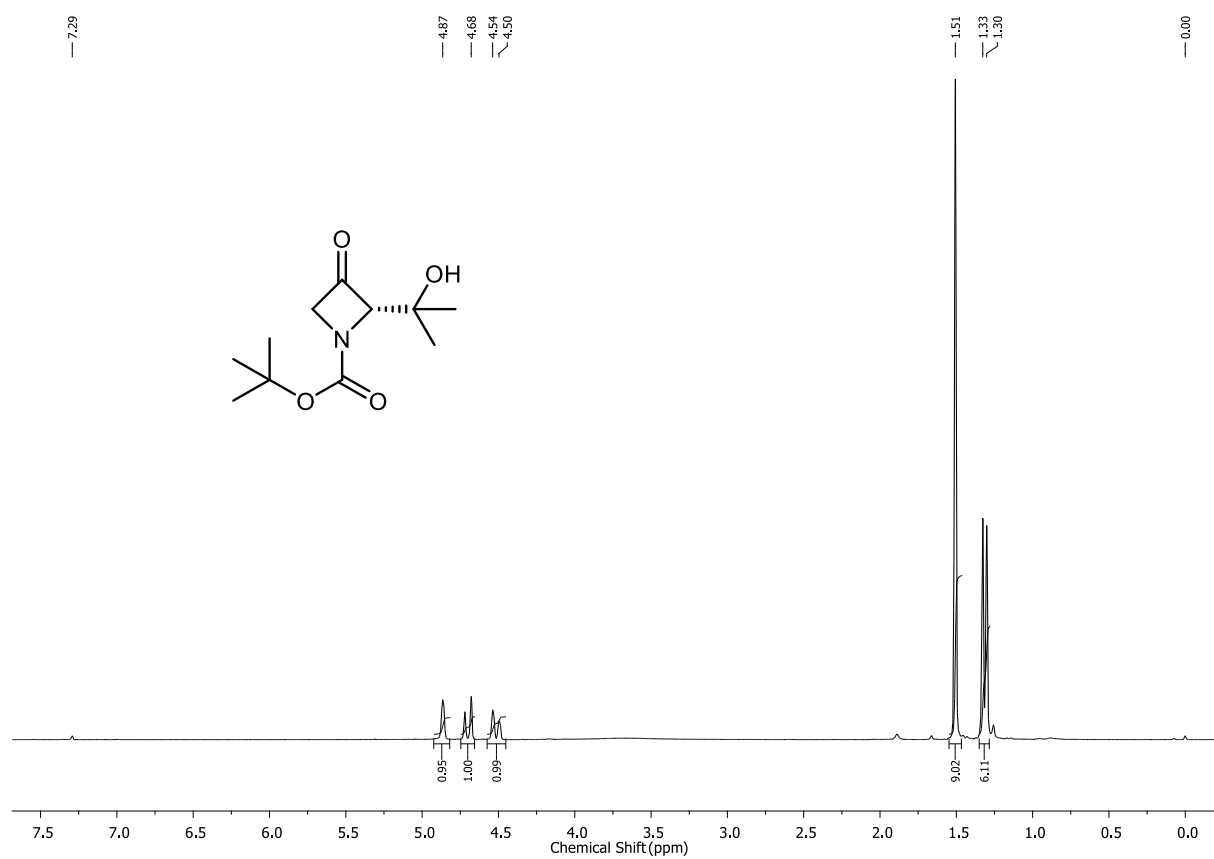**14**  $^1\text{H}$  NMR (400 MHz,  $\text{CDCl}_3$ )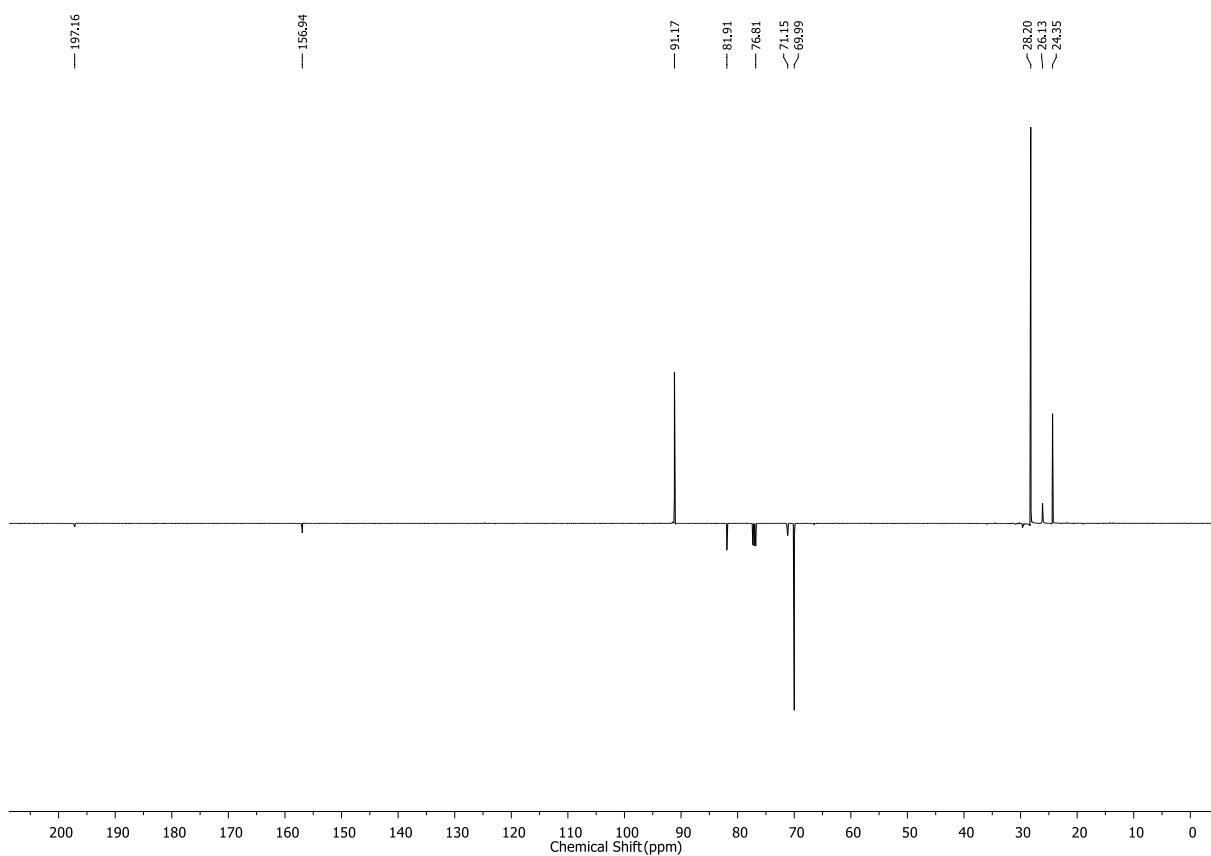**14**  $^{13}\text{C}$  NMR (125 MHz,  $\text{CDCl}_3$ )

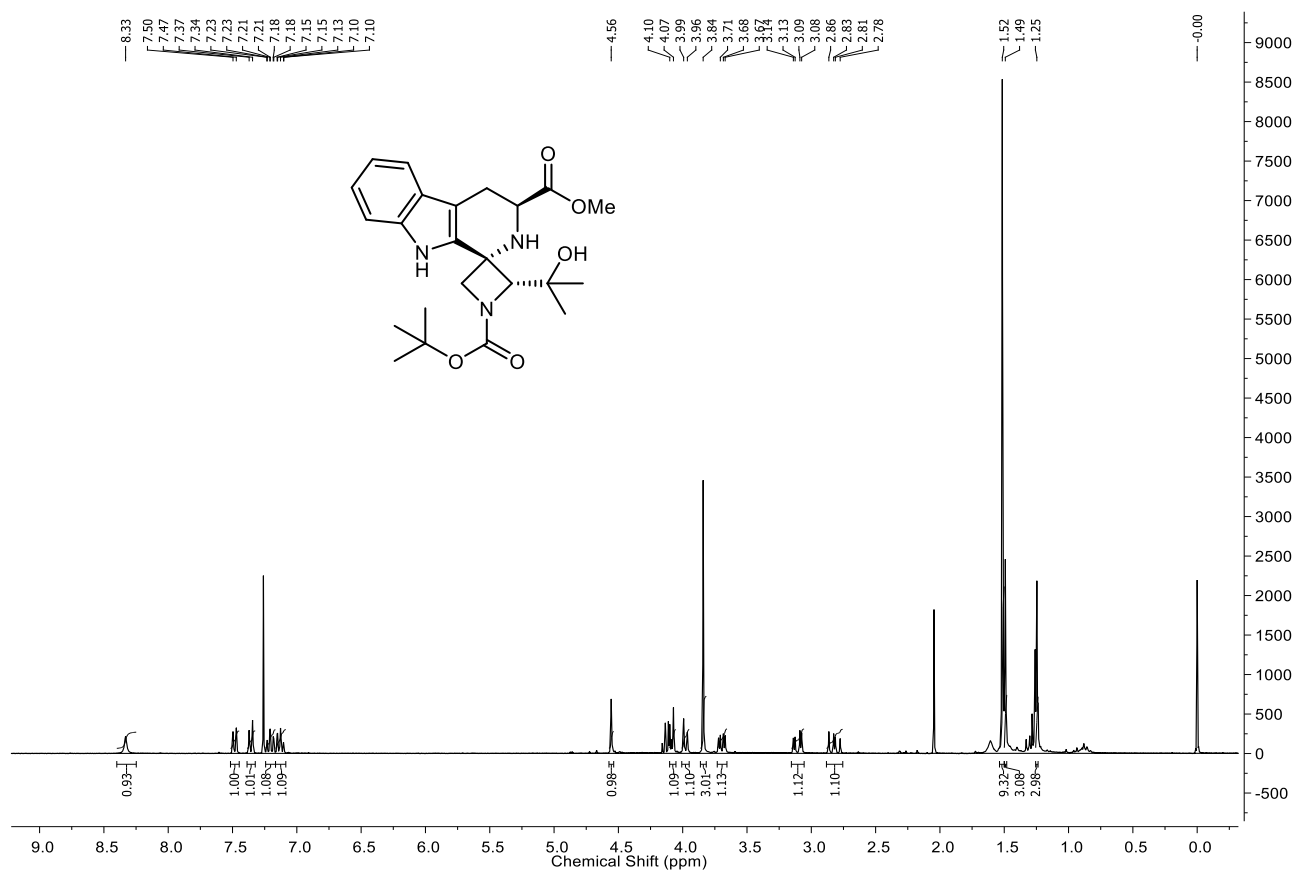

**15** <sup>1</sup>H NMR (300 MHz, CDCl<sub>3</sub>)

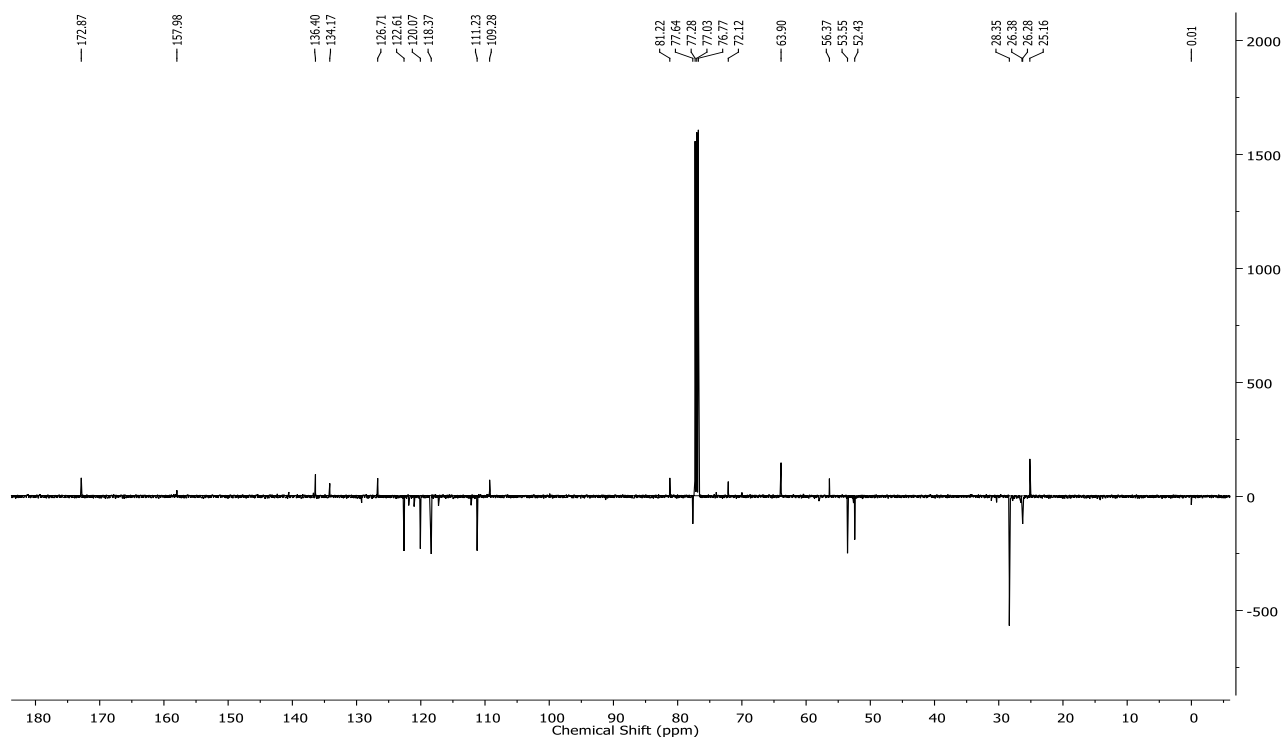

**15** <sup>13</sup>C NMR (125 MHz, CDCl<sub>3</sub>)

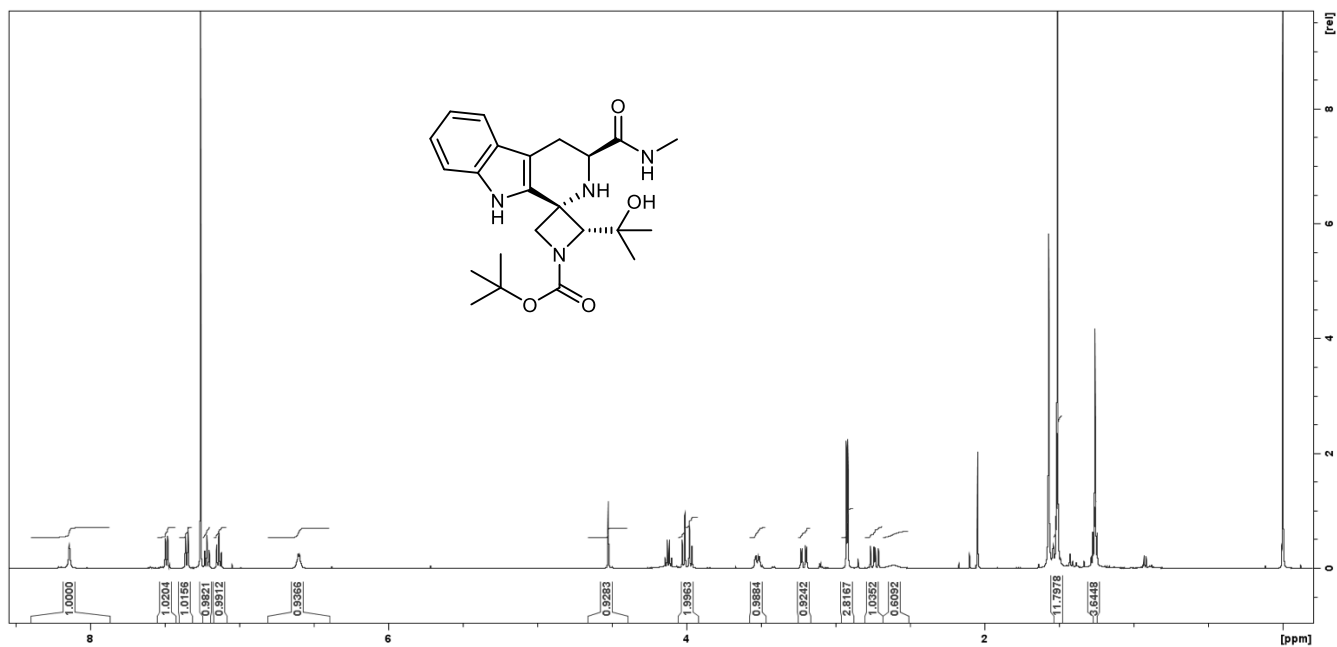

**16**  $^1\text{H}$  NMR (500 MHz,  $\text{CDCl}_3$ )

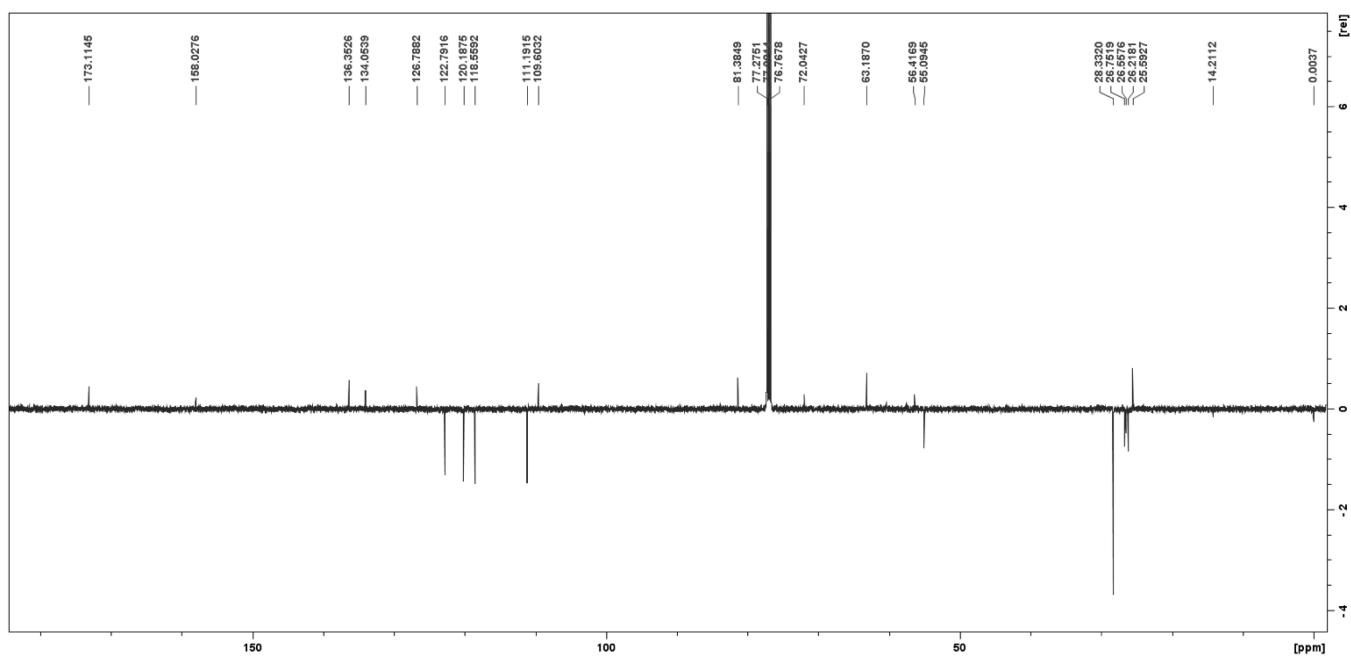

**16**  $^{13}\text{C}$  NMR (125 MHz,  $\text{CDCl}_3$ )

### Chiral GC Chromatograms for 4

Chromopac cyclodextrin- $\beta$ -236M-19 50m x 0.25mm x 0.25 $\mu$ m column, T = 110°C, P = 15 psi, H<sub>2</sub> carrier gas

Prepared from SAMP Hydrazone (*S*)-1 (*ee* = 81%):

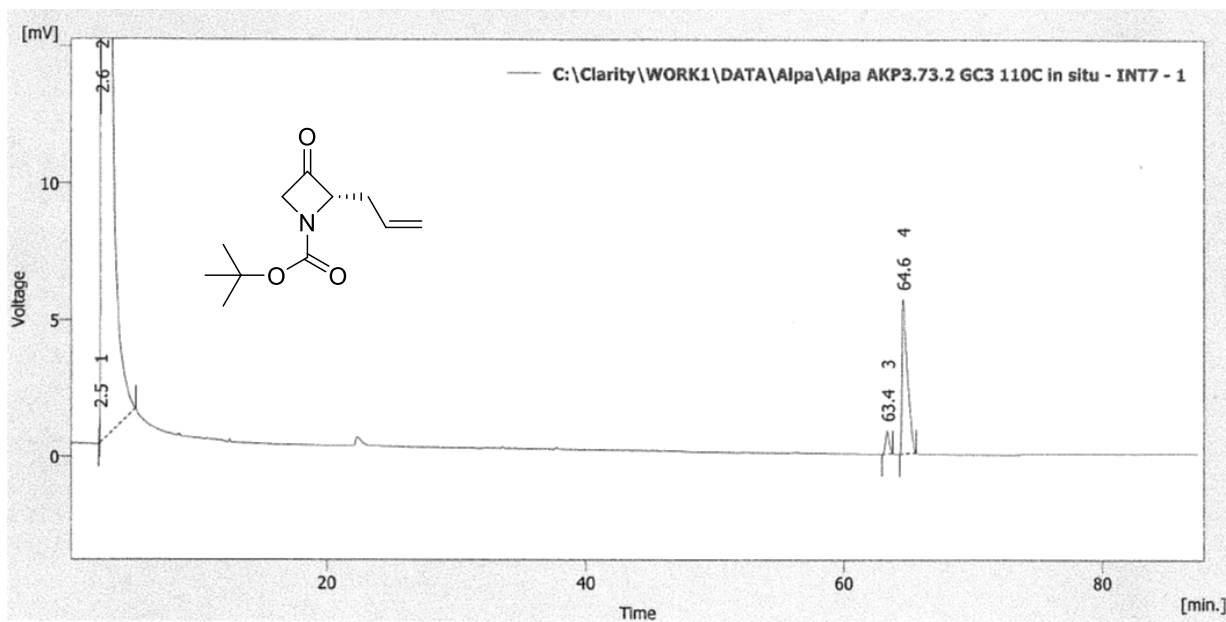

Result Table (Uncal - C:\Clarity\WORK1\DATA\Alpa\Alpa AKP3.73.2 GC3 110C in situ - INT7 - 1)

|       | Reten. Time<br>[min] | Area<br>[mV.s] | Height<br>[mV] | Area<br>[%] | Height<br>[%] | W05<br>[min] | Compound<br>Name |
|-------|----------------------|----------------|----------------|-------------|---------------|--------------|------------------|
| 1     | 2.460                | 4.400          | 0.959          | 0.0         | 0.1           | 0.09         |                  |
| 2     | 2.593                | 31199.835      | 1249.448       | 99.4        | 99.4          | 0.39         |                  |
| 3     | 63.353               | 17.239         | 0.853          | 0.1         | 0.1           | 0.32         |                  |
| 4     | 64.553               | 166.146        | 5.661          | 0.5         | 0.5           | 0.47         |                  |
| Total |                      | 31387.619      | 1256.922       | 100.0       | 100.0         |              |                  |

Prepared from dimethyl hydrazone 5 (racemic):

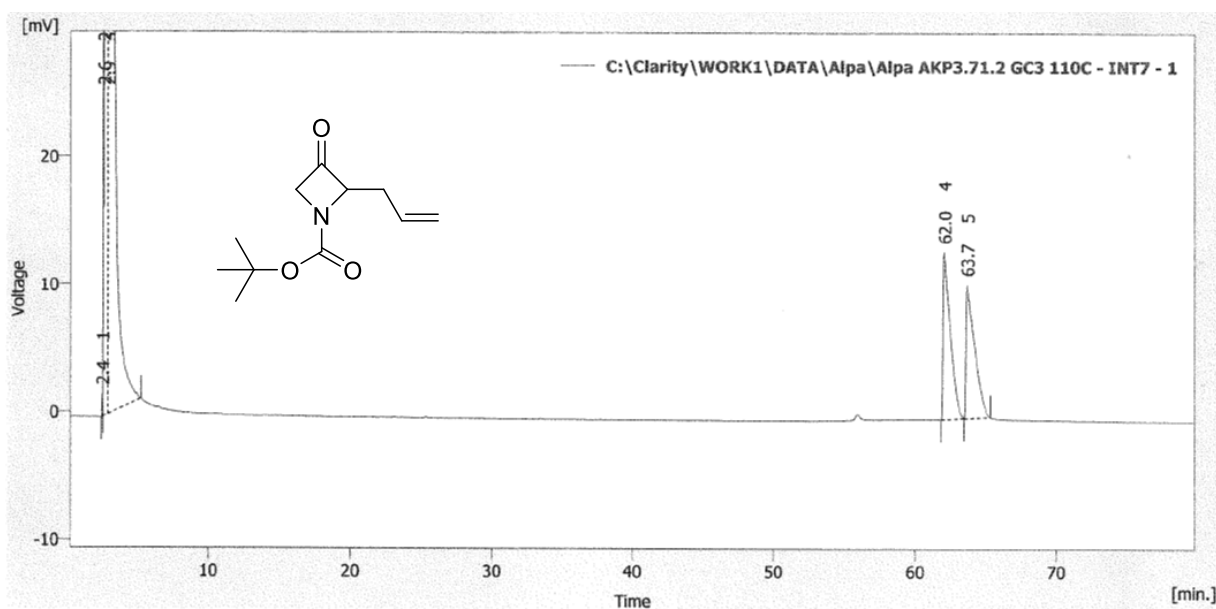

Prepared from RAMP Hydrazone (*R*)-**1** (*ee* = 81%):

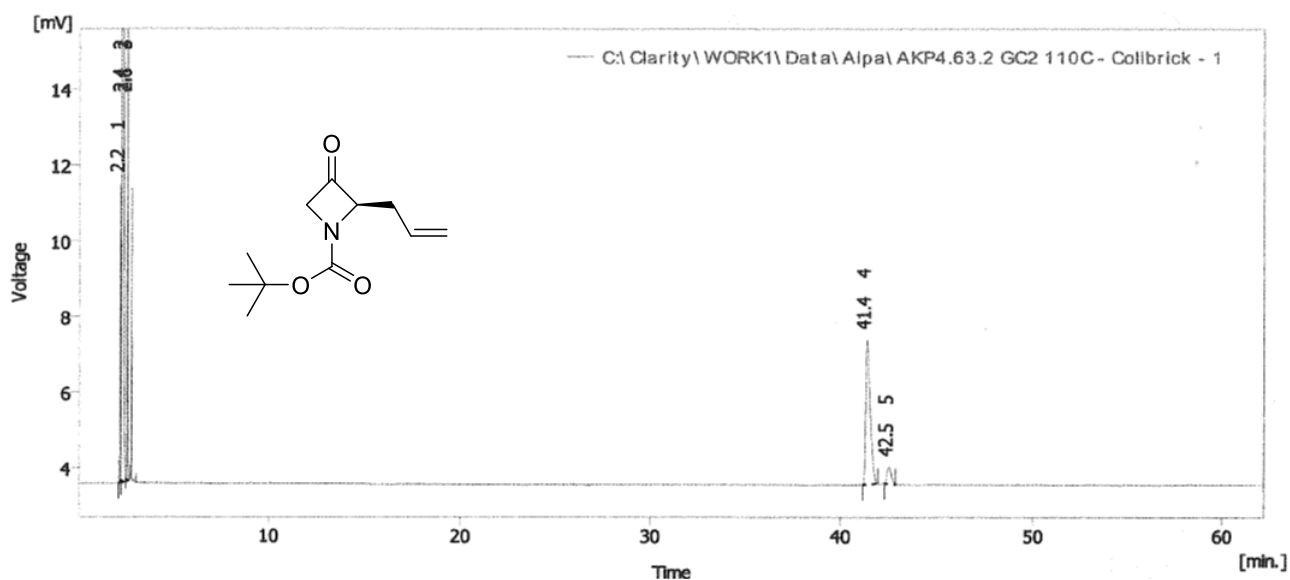

Result Table (Uncal - C:\Clarity\WORK1\Data\Alpa\AKP4.63.2 GC2 110C - Colibrick - 1)

|   | Reten. Time<br>[min] | Area<br>[mV.s] | Height<br>[mV] | Area<br>[%] | Height<br>[%] | W05<br>[min] | Compound<br>Name |
|---|----------------------|----------------|----------------|-------------|---------------|--------------|------------------|
| 1 | 2.228                | 15.945         | 7.904          | 0.3         | 0.8           | 0.02         |                  |
| 2 | 2.368                | 4935.699       | 979.956        | 97.8        | 97.3          | 0.09         |                  |
| 3 | 2.600                | 27.271         | 14.861         | 0.5         | 1.5           | 0.02         |                  |
| 4 | 41.372               | 63.504         | 3.810          | 1.3         | 0.4           | 0.26         |                  |
| 5 | 42.524               | 6.572          | 0.433          | 0.1         | 0.0           | 0.24         |                  |
|   | Total                | 5048.990       | 1006.964       | 100.0       | 100.0         |              |                  |

Prepared from dimethyl hydrazone **5** (racemic):

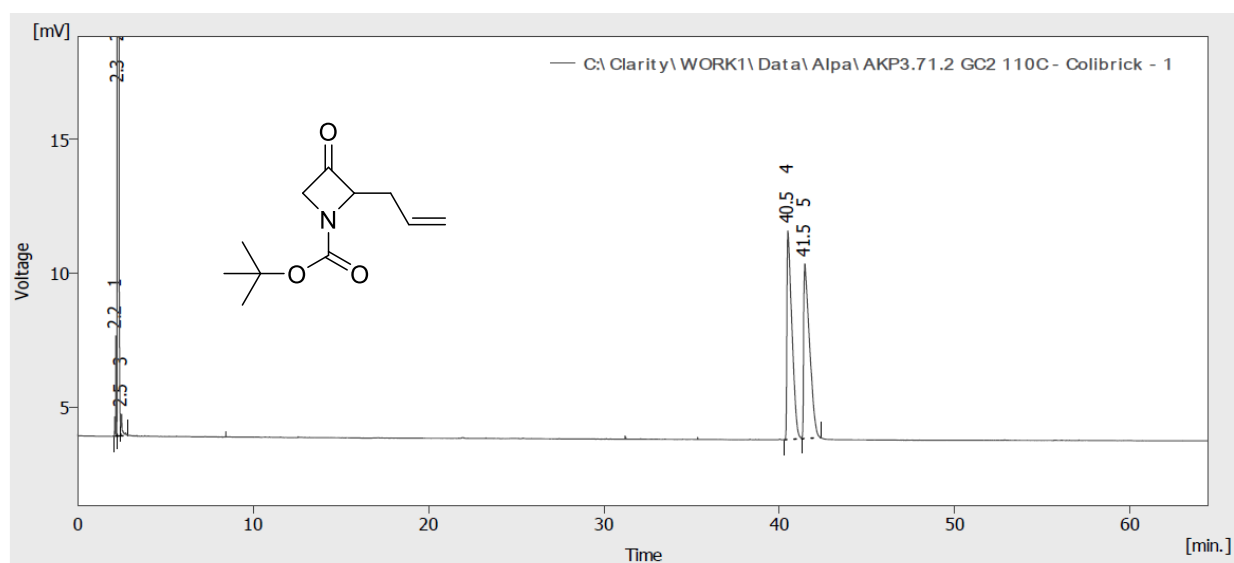

Different GC set ups and columns were used for analysis of the two enantiomers leading to different retention times in the (*R*)- and (*S*)-series. However, in each case the integrity of the analysis was confirmed by splitting of the racemic material.

### Chiral HPLC Chromatogram for 7

Chiralpak AD-H column (0.46cm ø x 25 cm), 99:1 hexane: propan-2-ol, T = 25°C, flow rate = 0.5 mL/min,  $\lambda$  = 224 nm.

Prepared from SAMP Hydrazone (*S*)-6 (*ee* = 7%):

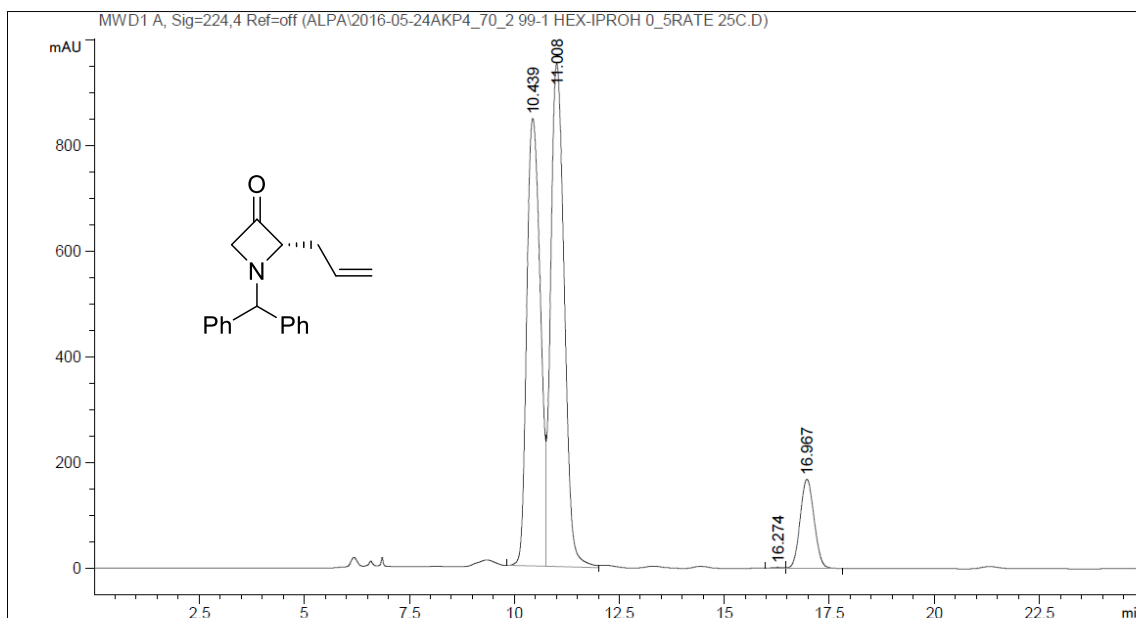

Prepared from racemic 6:

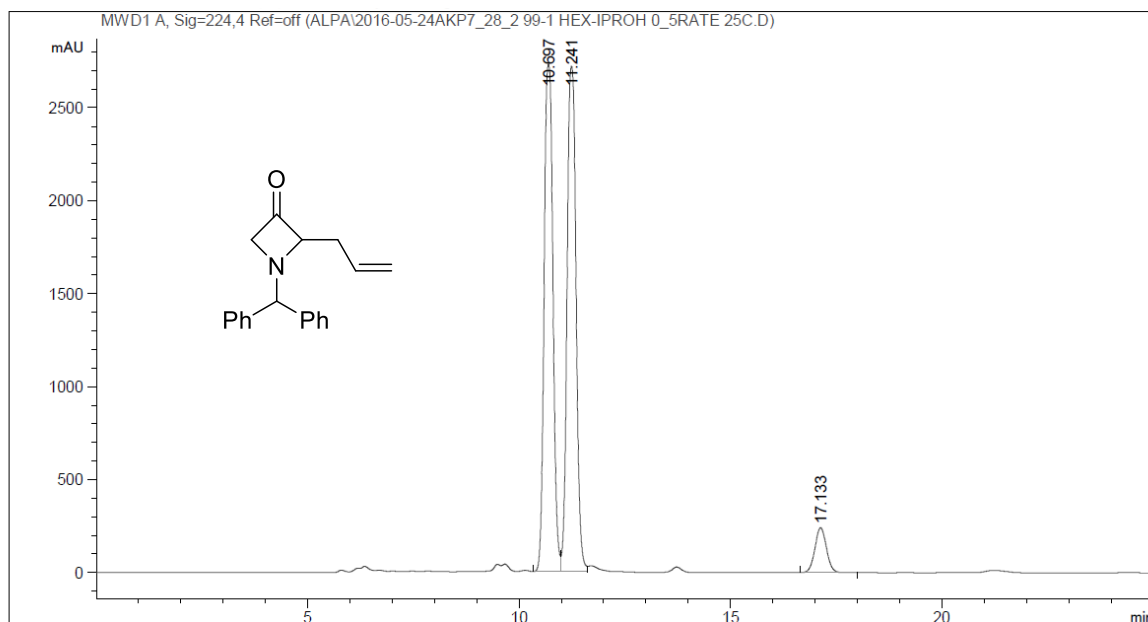



### Chiral GC Chromatograms for 8

Chrompac cyclodextrin- $\beta$ -236M-19 50m x 0.25mm x 0.25 $\mu$ m column, T = 140°C, P = 15 psi, He carrier gas

Prepared from SAMP Hydrazone (*S*)-**1** (*ee* = 81%):

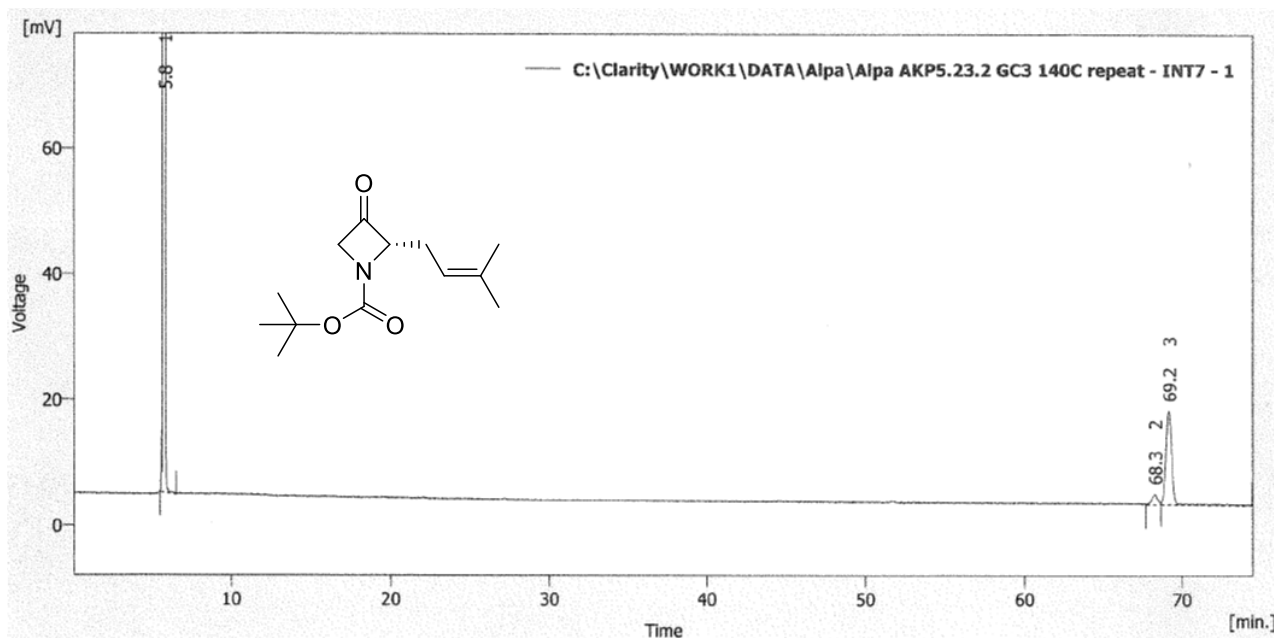

Result Table (Uncal - C:\Clarity\WORK1\DATA\Alpa\Alpa AKP5.23.2 GC3 140C repeat - INT7 - 1)

|       | Reten. Time<br>[min] | Area<br>[mV.s] | Height<br>[mV] | Area<br>[%] | Height<br>[%] | W05<br>[min] | Compound<br>Name |
|-------|----------------------|----------------|----------------|-------------|---------------|--------------|------------------|
| 1     | 5.787                | 8845.573       | 995.046        | 95.0        | 98.4          | 0.16         |                  |
| 2     | 68.267               | 43.767         | 1.657          | 0.5         | 0.2           | 0.41         |                  |
| 3     | 69.173               | 420.547        | 14.961         | 4.5         | 1.5           | 0.40         |                  |
| Total |                      | 9309.887       | 1011.664       | 100.0       | 100.0         |              |                  |

Prepared from dimethyl hydrazone **5** (racemic):

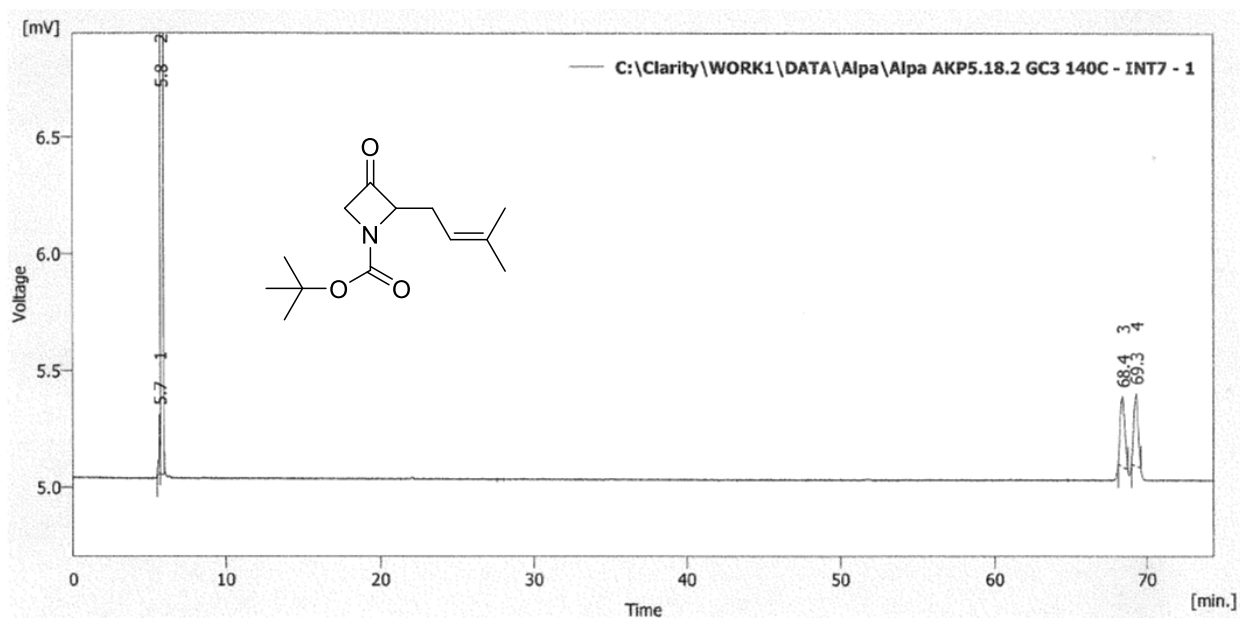

### Chiral HPLC Chromatograms for 9

Chiralcel OJ column (0.46cm ø x 25 cm), 97:3 hexane: propan-2-ol, T = 25°C, flow rate = 0.5 mL/min,  $\lambda$  = 254 nm.

Prepared from SAMP Hydrazone (*S*)-**1** (*ee* = 77%):

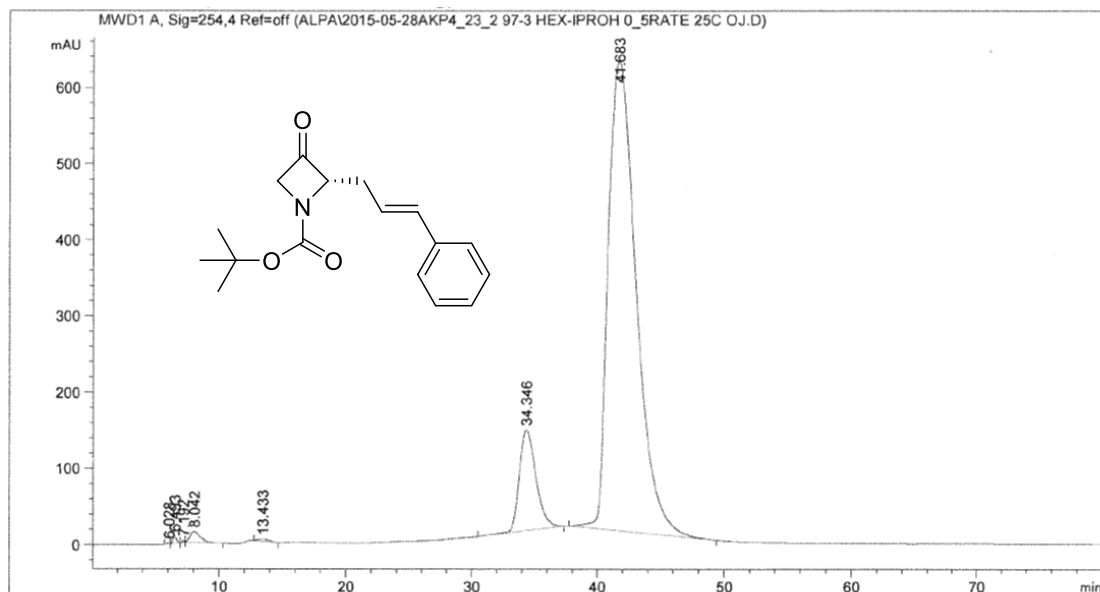

| Peak # | RetTime [min] | Type | Width [min] | Area [mAU*s] | Height [mAU] | Area %  |
|--------|---------------|------|-------------|--------------|--------------|---------|
| 1      | 6.028         | BV   | 0.1974      | 29.61179     | 1.78173      | 0.0273  |
| 2      | 6.493         | VB   | 0.2751      | 204.86739    | 9.87397      | 0.1889  |
| 3      | 7.192         | BV   | 0.1922      | 44.49460     | 3.25113      | 0.0410  |
| 4      | 8.042         | VB   | 0.7209      | 919.04889    | 14.95653     | 0.8474  |
| 5      | 13.433        | BB   | 0.6974      | 164.05620    | 2.75431      | 0.1513  |
| 6      | 34.346        | BB   | 1.0880      | 1.22208e4    | 132.02003    | 11.2681 |
| 7      | 41.683        | BB   | 1.8039      | 9.48725e4    | 615.98022    | 87.4760 |

Totals : 1.08455e5 780.61792

Prepared from dimethyl hydrazone **5** (racemic):

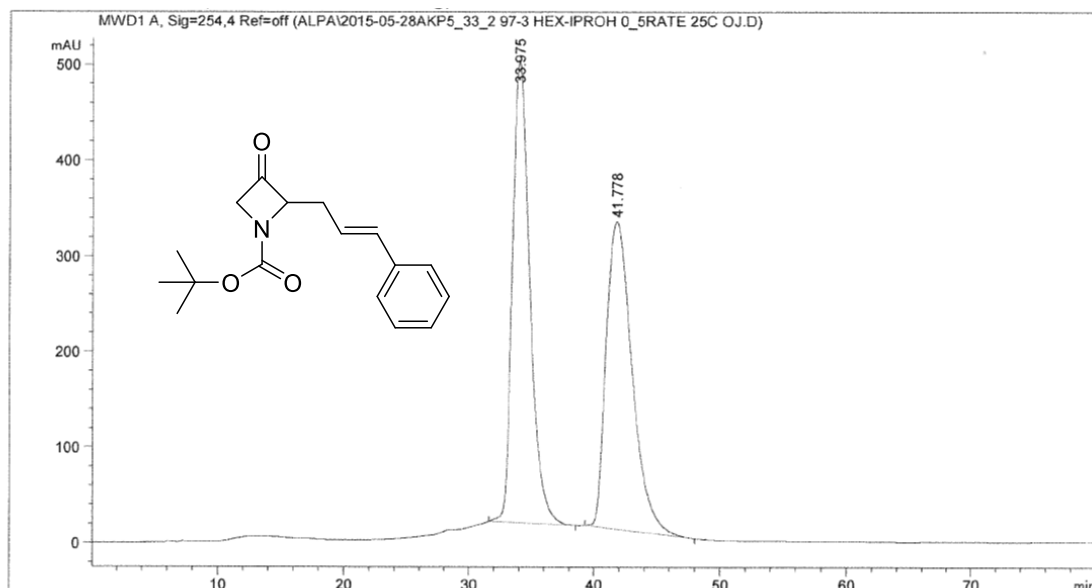

### Chiral GC Chromatograms for 10

CP-ChiraSil-DEX CB 25m x 0.25mm x 0.25 $\mu$ m column, T = 130°C, P = 18 psi, He carrier gas.

Prepared from SAMP Hydrazone (*S*)-**1** (*ee* = 79%):

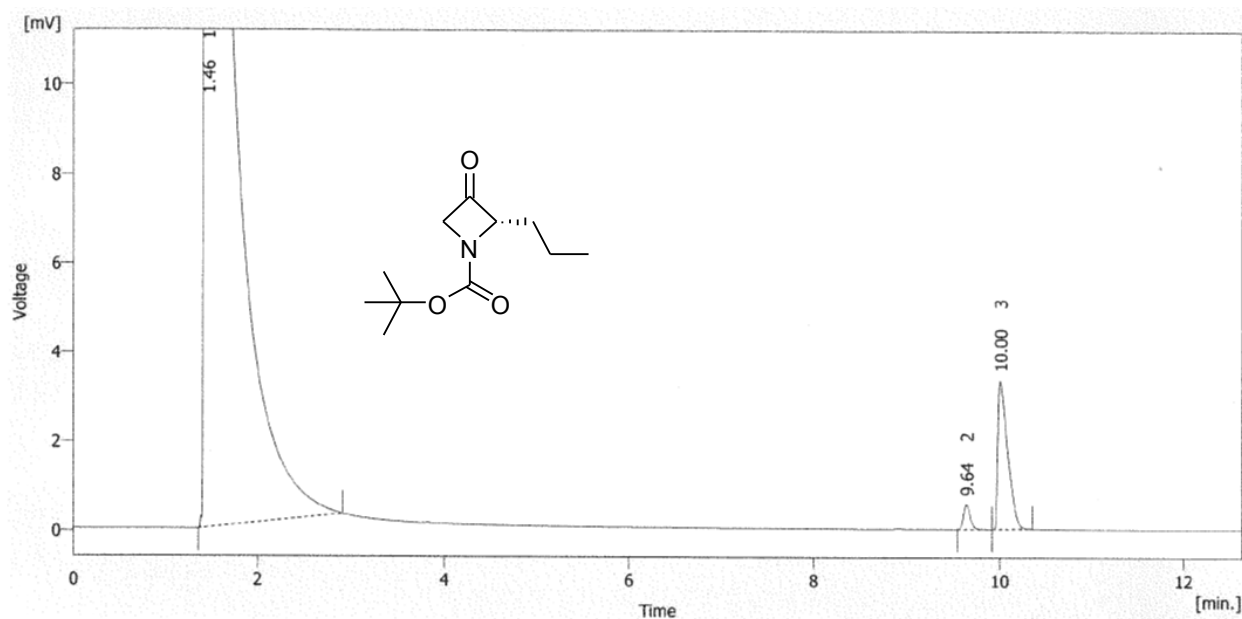

Result Table (Uncal - C:\Clarity\WORK1\DATA\Alpa\Alpa AKP4.30.2 130C final zoom - U-PAD2 - 1)

|   | Reten. Time<br>[min] | Area<br>[mV.s] | Height<br>[mV] | Area<br>[%] | Height<br>[%] | W05<br>[min] | Compound<br>Name |
|---|----------------------|----------------|----------------|-------------|---------------|--------------|------------------|
| 1 | 1.460                | 5815.508       | 1094.093       | 99.5        | 99.6          | 0.08         |                  |
| 2 | 9.640                | 2.790          | 0.547          | 0.0         | 0.0           | 0.08         |                  |
| 3 | 10.004               | 23.949         | 3.329          | 0.4         | 0.3           | 0.12         |                  |
|   | Total                | 5842.247       | 1097.969       | 100.0       | 100.0         |              |                  |

Prepared from dimethyl hydrazone **5** (racemic):

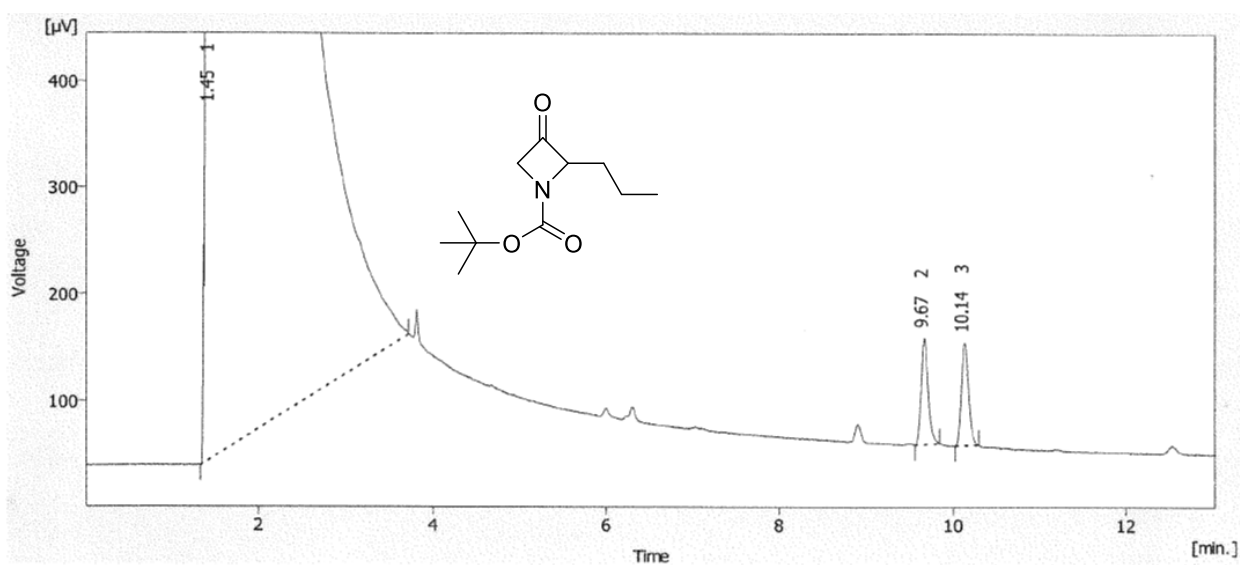

# Chiral GC Chromatograms for 11

CP-ChiraSil-DEX CB 25m x 0.25mm x 0.25µm column, T = 130°C, P = 18 psi, He carrier gas.

Prepared from SAMP Hydrazone (*S*)-**1** (*ee* = 85%):

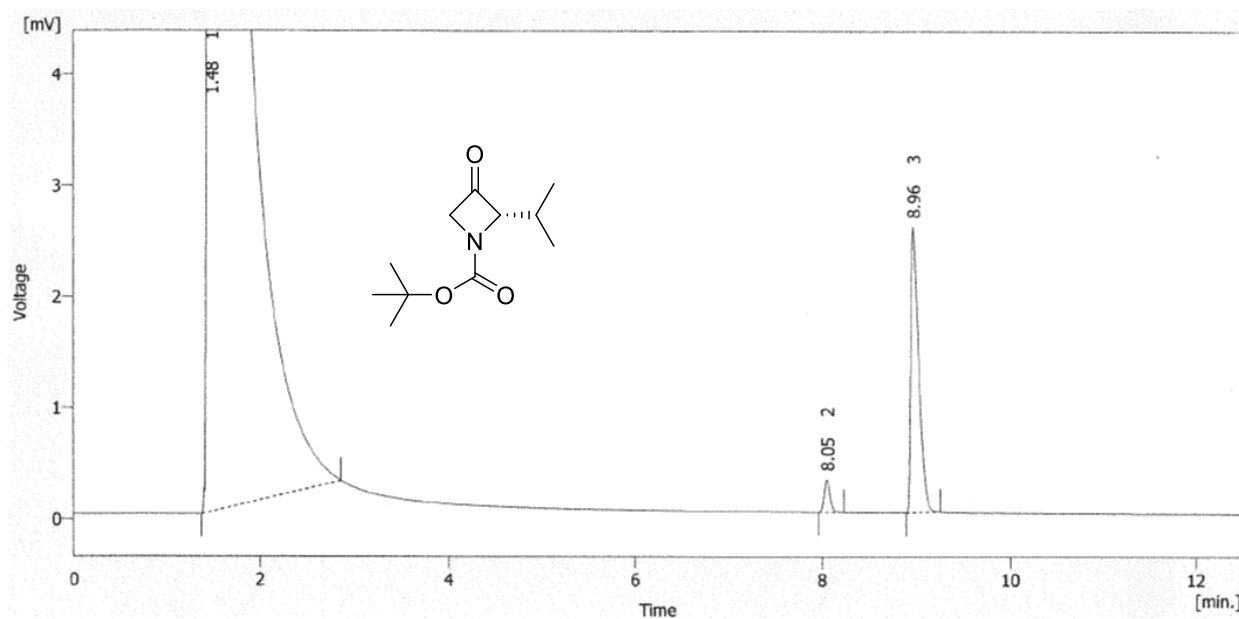

Result Table (Uncal - C:\Clarity\WORK1\DATA\Alpa\Alpa AKP4.36.2 130C - U-PAD2 - 1)

|       | Reten. Time<br>[min] | Area<br>[mV.s] | Height<br>[mV] | Area<br>[%] | Height<br>[%] | W05<br>[min] | Compound<br>Name |
|-------|----------------------|----------------|----------------|-------------|---------------|--------------|------------------|
| 1     | 1.476                | 5195.910       | 1094.038       | 99.7        | 99.7          | 0.07         |                  |
| 2     | 8.052                | 1.254          | 0.290          | 0.0         | 0.0           | 0.07         |                  |
| 3     | 8.964                | 15.128         | 2.566          | 0.3         | 0.2           | 0.10         |                  |
| Total |                      | 5212.292       | 1096.894       | 100.0       | 100.0         |              |                  |

Prepared from dimethyl hydrazone **5** (racemic):

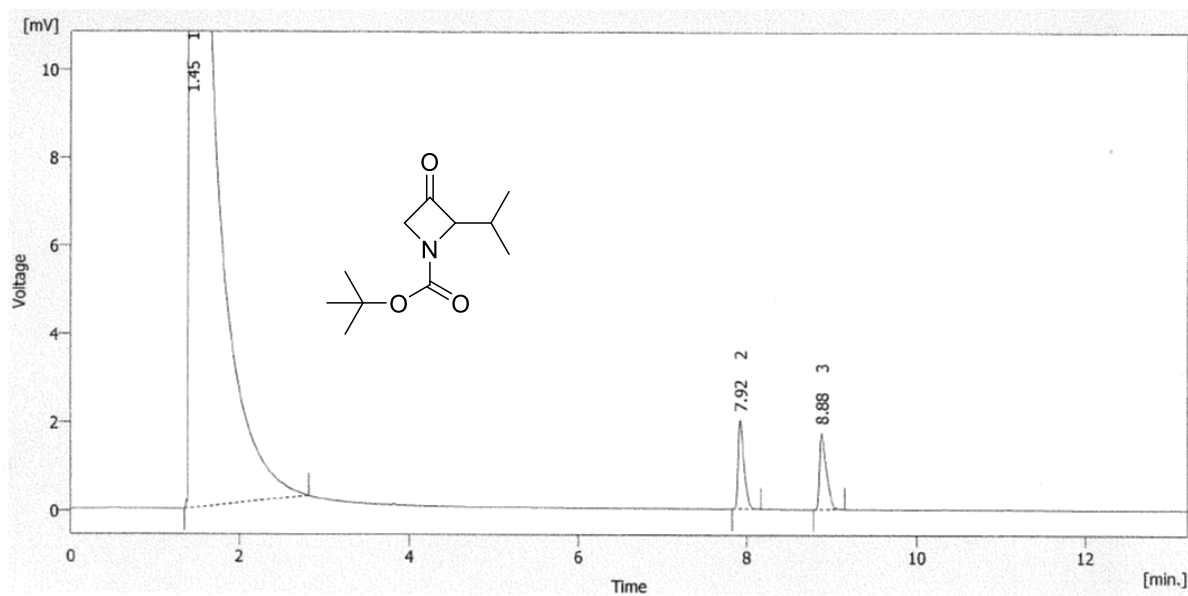

### Chiral HPLC Chromatograms for 12

Chiralcel OD column (0.46cm ø x 25 cm), 99:1 hexane: propan-2-ol, T = 23°C, flow rate = 0.5 mL/min,  $\lambda$  = 254 nm.

Prepared from SAMP Hydrazone (*S*)-**1** (*ee* = 33%):

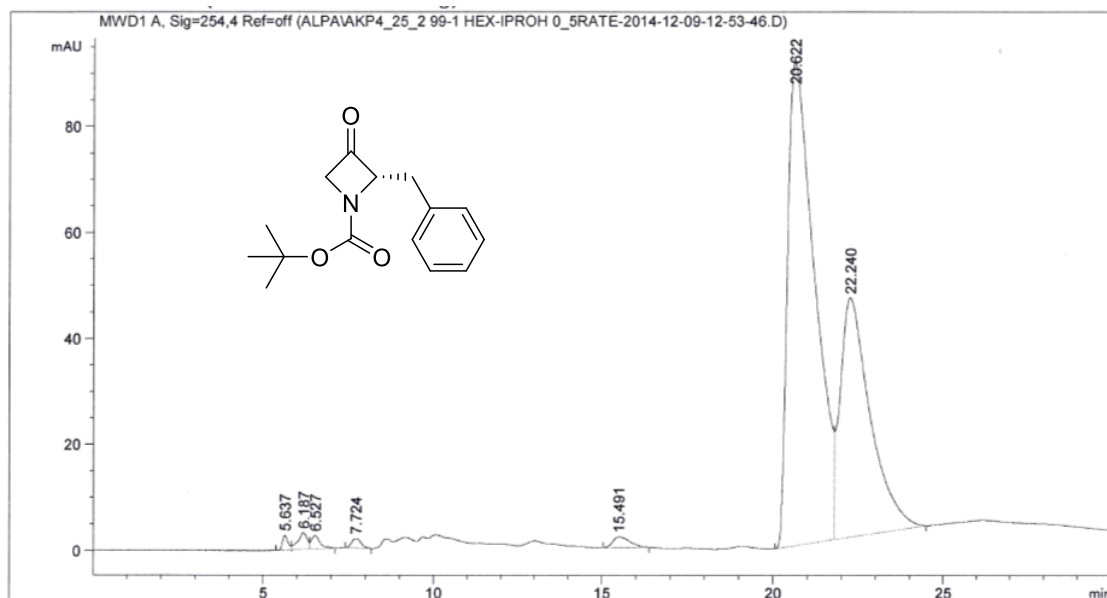

| Peak # | RetTime [min] | Type | Width [min] | Area [mAU*s] | Height [mAU] | Area %  |
|--------|---------------|------|-------------|--------------|--------------|---------|
| 1      | 5.637         | BV   | 0.1673      | 31.57697     | 2.78368      | 0.3938  |
| 2      | 6.187         | VV   | 0.2370      | 59.39250     | 3.17820      | 0.7406  |
| 3      | 6.527         | VB   | 0.2107      | 44.57138     | 2.50346      | 0.5558  |
| 4      | 7.724         | BB   | 0.2237      | 33.44839     | 1.76827      | 0.4171  |
| 5      | 15.491        | VB   | 0.4103      | 70.99445     | 2.03346      | 0.8853  |
| 6      | 20.622        | BV   | 0.7427      | 5002.23389   | 91.16113     | 62.3763 |
| 7      | 22.240        | VB   | 0.7446      | 2777.23462   | 45.21692     | 34.6312 |

Totals : 8019.45220 148.64511

Prepared from dimethyl hydrazone **5** (racemic):

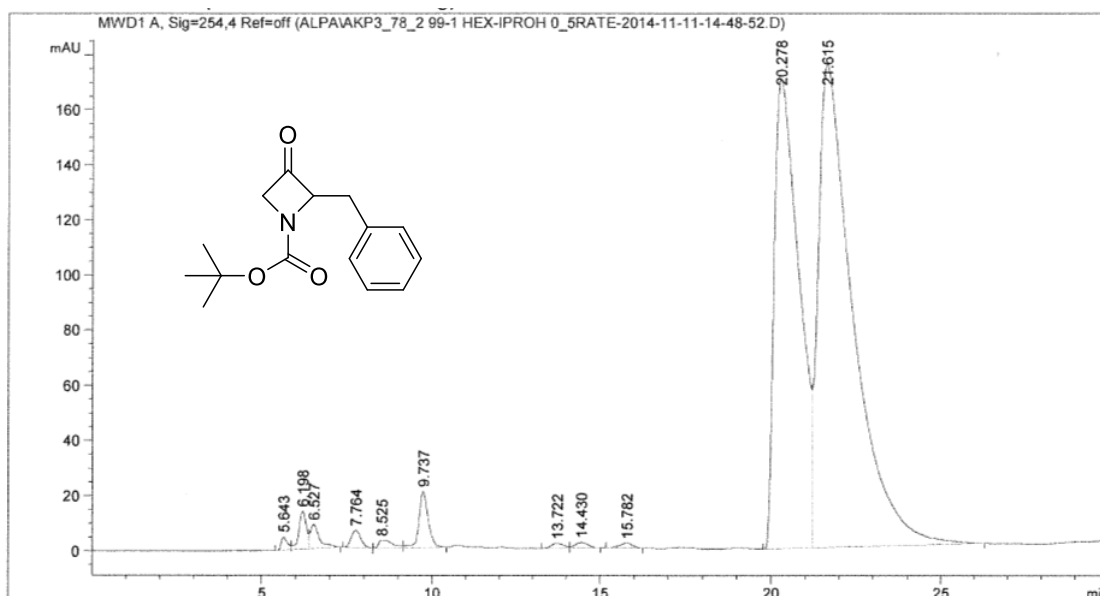

### Chiral HPLC Chromatograms for 13

Chiralcel OJ column (0.46cm ø x 25 cm), 9:1 hexane: propan-2-ol, T = 25°C, flow rate = 0.5 mL/min,  $\lambda$  = 254 nm.

Prepared from SAMP Hydrazone (*S*)-1 (*ee* = 78%):

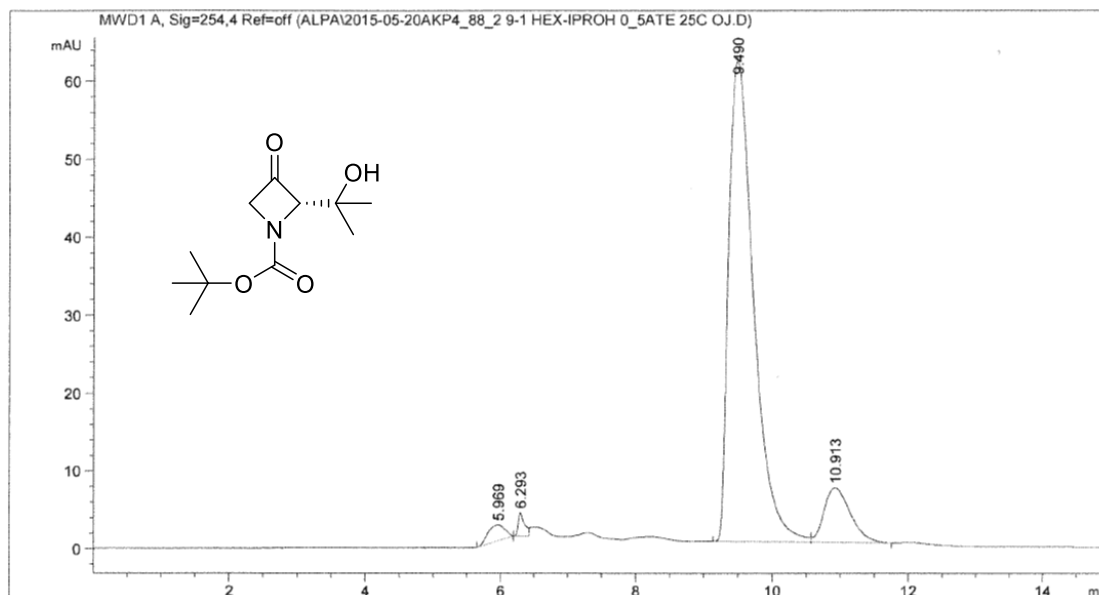

| Peak # | RetTime [min] | Type | Width [min] | Area [mAU*s] | Height [mAU] | Area %  |
|--------|---------------|------|-------------|--------------|--------------|---------|
| 1      | 5.969         | BB   | 0.2158      | 36.22143     | 2.00001      | 2.0080  |
| 2      | 6.293         | BV   | 0.0883      | 19.41742     | 3.00964      | 1.0765  |
| 3      | 9.490         | BV   | 0.3895      | 1557.19141   | 61.58243     | 86.3277 |
| 4      | 10.913        | VB   | 0.3383      | 190.98471    | 7.05560      | 10.5878 |

Totals : 1803.81496 73.64767

Prepared from dimethyl hydrazone **5** (racemic):

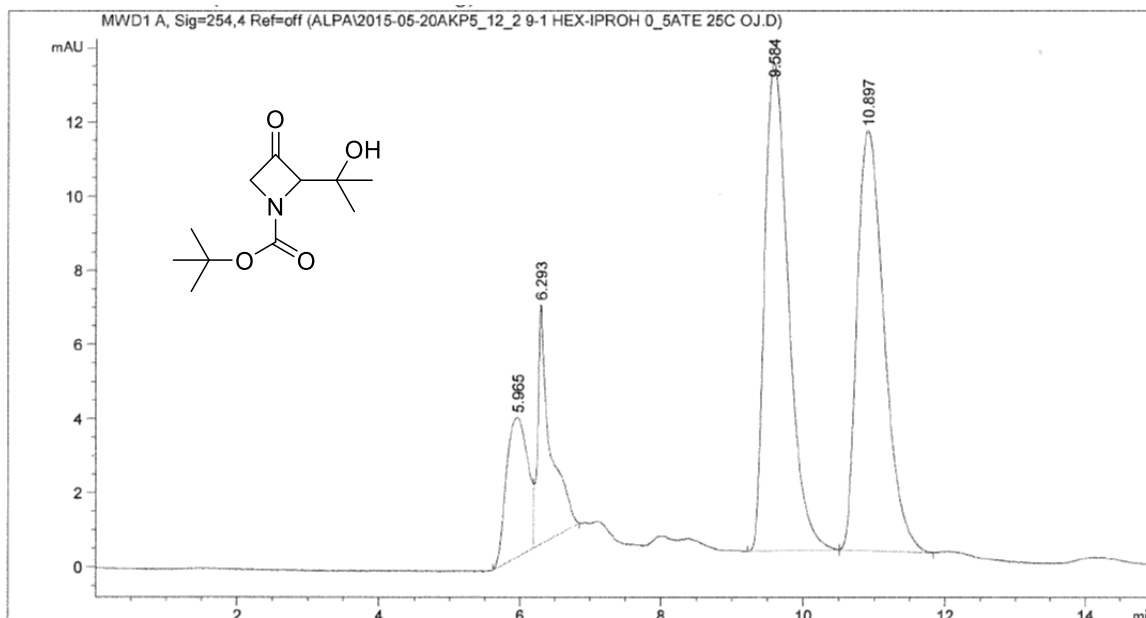

### Chiral HPLC Chromatograms for 14

Chiralpak IA column (0.46cm ø x 25 cm), 95:5 hexane: propan-2-ol, T = 25°C, flow rate = 0.5 mL/min,  $\lambda$  = 254 nm.

Prepared from SAMP Hydrazone (*S*)-1 (*ee* = 31%, 17%):

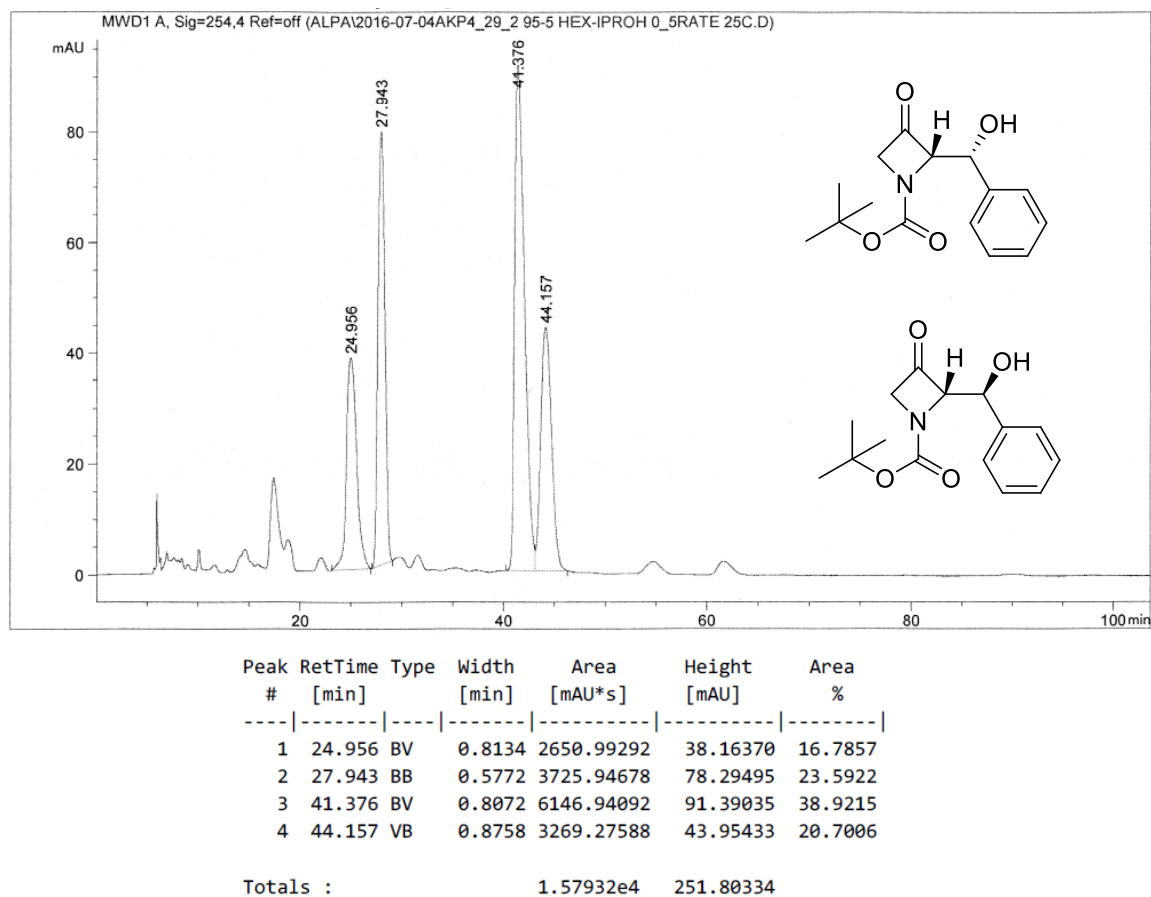

Prepared from dimethyl hydrazone **5** (racemic):

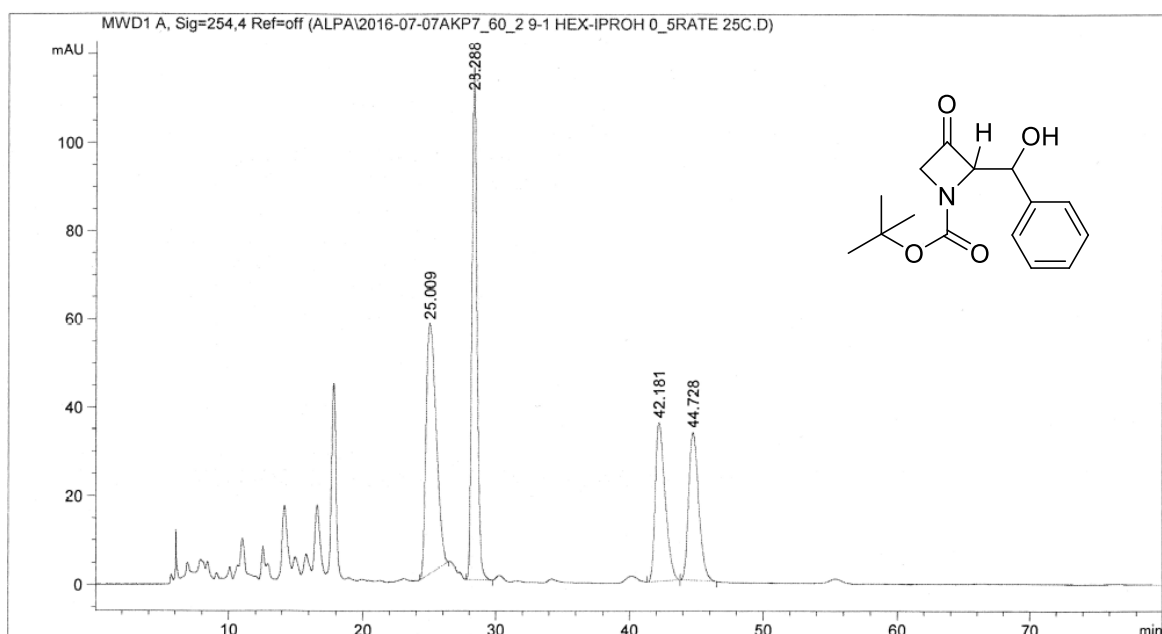

**References**

- 1 Dolomanov, O. V.; Bourhis, L. J.; Gildea, R. J.; Howard, J. A. K.; Puschmann, H. *J. Appl. Cryst.* **2009**, *42*, 339-341.
- 2 Sheldrick, G. M. *Acta Cryst.* **2015**, *A71*, 3-8.
- 3 Sheldrick, G. M. *Acta Cryst.* **2015**, *C71*, 3-8.
